1 **Running Title:** Cloning of a kernel size QTL in maize

2

3 **Correspondence to:** Jianbing Yan (email: [yjianbing@mail.hzau.edu.cn](mailto:yjianbing@mail.hzau.edu.cn)) and David Jackson

4 ([jacksond@cshl.edu](mailto:jacksond@cshl.edu))

5 Tel: +86 27 87280110

6 National Key Laboratory of Crop Genetic Improvement, No.1 Shizishan Street, Hongshan

7 District, Wuhan, Hubei 430070, China.

8

9 **Article title**

10 *qKW9* encodes a pentatricopeptide repeat protein affecting photosynthesis and grain filling in

11 maize

12 **Authors**

13 Juan Huang<sup>1</sup>, Gang Lu<sup>1</sup>, Lei Liu<sup>1,2</sup>, Mohammad Sharif Raihan<sup>1</sup>, Jieting Xu<sup>1,3</sup>, Liumei Jian<sup>1</sup>,

14 Lingxiao Zhao<sup>4,5</sup>, Thu M. Tran<sup>2,6</sup>, Qinghua Zhang<sup>1</sup>, Jie Liu<sup>1</sup>, Wenqiang Li<sup>1</sup>, Cunxu Wei<sup>4</sup>, David

15 M. Braun<sup>6</sup>, Qing Li<sup>1</sup>, Alisdair R. Fernie<sup>7</sup>, David Jackson<sup>1,2,\*</sup>, Jianbing Yan<sup>1,\*</sup>

16

17 <sup>1</sup>National Key Laboratory of Crop Genetic Improvement, Huazhong Agricultural University,

18 Wuhan 430070, China

19 <sup>2</sup>Cold Spring Harbor Laboratory, Cold Spring Harbor, NY, USA.

20 <sup>3</sup>Wimi Biotechnology Co., Ltd, 4th Floor, Kejizhuanhua building, No. 3 Meishan Road,

21 Xinbei District, Changzhou City, Jiangsu Province, China

22 <sup>4</sup>Jiangsu Key Laboratory of Crop Genetics and Physiology, Co-Innovation Center for Modern

23 Production Technology of Grain Crops, Yangzhou University, Yangzhou 225009, China

24 <sup>5</sup>Jiangsu Xuzhou Sweetpotato Research Center, Xuzhou, Jiangsu, China

25 <sup>6</sup>Division of Biological Sciences, Interdisciplinary Plant Group, Missouri Maize Center,

26 University of Missouri, Columbia, MO 65211, USA

27 <sup>7</sup>Department of Molecular Physiology, Max-Planck-Institute of Molecular Plant Physiology,

28 Am Mühlenberg 1, 14476 Potsdam-Golm, Germany

29

30 **One sentence summary**

31 A pentatricopeptide repeat protein exerts quantitative effect on maize kernel weight and size  
32 by affecting photosynthesis and grain filling.

33

34 **Funding information**

35 This work was supported by the National Key Research and Development Program of China  
36 (2016YFD0100303), the National Natural Science Foundation of China (31525017,  
37 31961133002), and NSF grant IOS-1546837 to DJ; Juan Huang was sponsored by China  
38 Scholarship Council to visit Cold Spring Harbor Laboratory and study in Prof. David Jackson's  
39 lab from March 2018 to March 2019 (File No. 201706760027).

40

41 **Author Contributions**

42 J.Y. designed and supervised this study. D.J. supervised the study in US side. J.H., G.L., and  
43 T. T finished most of the mentioned experiments. Lei. L conducted RNA sequence data  
44 analysis. M. S. R. and Jie. L involved in the initial QTL mapping. J.H., G.L. and W. L.  
45 performed the field experiments. J.X. and L.J. conducted the transgenic transformation. L.Z.  
46 and C.W. performed cytological experiments. Q.Z. constructed the RNA sequencing library  
47 and finished the sequencing. J.H., D.B., Q.L., A.F., D.J., and J.Y. contribute a lot of  
48 constructive discussions and wrote or revised the manuscript.

49 **Competing financial interests**

50 The authors declare no competing financial interests.

51 **Abstract (<250 words)**

52 Kernel weight is an important yield component in maize that was selected during  
53 domestication. Many kernel weight genes have been identified through mutant analysis, and  
54 are mostly involved in the biogenesis and functional maintenance of organelles or other  
55 fundamental cellular activities. However, only a limited number of loci underlying quantitative  
56 variation in kernel weight have been cloned. Here we characterize a maize kernel weight QTL,

57 *qKW9* and find that it encodes a DYW motif pentatricopeptide repeat protein involved in  
58 C-to-U editing of NdhB, a subunit of the chloroplast NADH dehydrogenase-like complex. In a  
59 null *qKW9* background, C-to-U editing of NdhB was abolished, and photosynthesis was  
60 reduced, suggesting that *qKW9* regulates kernel weight by controlling the maternal source of  
61 photosynthate for grain filling. Characterization of *qKW9* highlights the importance of  
62 optimizing photosynthesis on maize grain yield production.

### 63 **Keywords**

64 Kernel weight; maize yield; QTL; photosynthesis; Cyclic electron transport; C-to-U editing;  
65 NDH complex

66

### 67 **INTRODUCTION**

68 Maize (*Zea mays*) is one of the most important crops in the world, producing grain vital for  
69 our survival. Along with population growth, environmental deterioration, the decline of arable  
70 land and climate change challenge us to increase maize grain production. Therefore, the  
71 improvement of maize yield is of great importance to the sustainable development of human  
72 society.

73 The grain yield of maize is comprised of several components, including ear number per  
74 plant, kernel number per cob, and kernel weight. As an essential yield component, kernel  
75 weight is positively correlated with yield, and is determined during development by kernel  
76 size and the degree of kernel filling (Scanlon and Takacs, 2009). To dissect the genetic  
77 architecture of maize kernel weight, numerous studies have identified hundreds of  
78 quantitative trait loci (QTL) for kernel traits ([www.maizegdb.org/qtl](http://www.maizegdb.org/qtl)). However, only a few  
79 kernel size QTL have been cloned and studied, and some maize kernel weight genes have  
80 been identified as homologs of rice genes (Li et al., 2010a; Li et al., 2010b; Liu et al., 2015).  
81 In one large-scale QTL study in maize, 729 QTL regulating kernel weight-related traits were  
82 identified, and 24 of 30 genes were in, or tightly linked to, 18 rice grain size genes, suggesting  
83 conserved genetic architecture of kernel weight (Liu et al., 2017b). One example is *teosinte*  
84 *glume architecture1* (*tgal*), the causal gene underlying the change from encased kernels in

85 the wild progenitor teosinte to naked kernels in maize (Wang et al., 2005; Wang et al., 2015).  
86 Reducing expression of *tg1* in maize by RNAi greatly increases kernel size and weight,  
87 suggesting that the removal of glumes from teosinte could release growth constraints, and  
88 provide more space to allow larger kernels to develop (Wang et al., 2015). Another kernel  
89 size gene, *ZmSWEET4c*, affects kernel weight in a different manner, with its product  
90 mediating sugar transport across the basal endosperm transfer cell layer, and shows signals of  
91 selection during domestication (Sosso et al., 2015). Recently a further gene, *BARELY ANY*  
92 *MERISTEM1d* (*ZmBAM1d*) was identified as an additional QTL responsible for kernel weight  
93 variation in maize (Yang et al., 2019).

94 Despite limited progress on our understanding of the quantitative variation in maize  
95 kernel weight, numerous kernel mutants have been identified (Neuffer and Sheridan, 1980;  
96 Clark and Sheridan, 1991). These mutants have been grouped into three categories: (i)  
97 defective kernel (*dek*) mutations, including empty pericarp (*emp*) mutants that affect both  
98 endosperm and embryo; (ii) embryo-specific (*emb*) mutations with healthy endosperm  
99 formation; and (iii) endosperm-specific mutations (McCarty, 2017). Mutants in categories i  
100 and ii have detrimental effects, leading to significant loss of kernel weight. Several of these  
101 maize kernel development genes have been identified. For instance, *EMP10* (Cai et al., 2017),  
102 *EMP11* (Ren et al., 2017), *EMP12* (Sun et al., 2019), *EMP16* (Xiu et al., 2016), *DEK35* (Chen  
103 et al., 2017), and *DEK37* (Dai et al., 2018) are involved in intron splicing of mitochondrial  
104 genes. In contrast, *MPPR6* functions in maturation and translation initiation of mitochondrial  
105 ribosomal protein subunit mRNA (Manavski et al., 2012). Mutations of these genes impair  
106 mitochondrial function, leading to defective kernels. Other genes, including *EMP7* (Sun et al.,  
107 2015), *DEK10* (Qi et al., 2017), *DEK39* (Li et al., 2018), *PPR2263/MITOCHONDRIAL*  
108 *EDITING FACTOR29* (Sosso et al., 2012), and *SMALL KERNEL1* (Li et al., 2014) function in  
109 C-to-U editing of transcripts in mitochondria and chloroplasts.

110 Many kernel size genes encode pentatricopeptide repeat (PPR) proteins, a large family  
111 of RNA-binding proteins in land plants, with more than 400 members in *Arabidopsis*  
112 (*Arabidopsis thaliana*), rice (*Oryza sativa*), and maize (*Zea mays*) (Lurin et al., 2004;

113 Schmitz-Linneweber and Small, 2008; Barkan and Small, 2014). Members of the PPR family  
114 are characterized by tandem arrays of a degenerate 35-amino-acid motif (PPR motif), and the  
115 PPR family is divided into P and PLS subfamilies, according to the nature of the PPR motifs.  
116 Members of the P subfamily function in various processes of RNA maturation in organelles,  
117 including RNA stabilization, splicing, intergenic RNA cleavage, and translation (Barkan and  
118 Small, 2014). The PLS subfamily contains canonical PPR (P) motifs, as well as long (L) and  
119 short (S) PPR-like motifs, in a P-L-S pattern. This subfamily is further divided into PLS,  
120 E/E+, and DYW classes, based on their C-terminal domains (Barkan and Small, 2014). PLS  
121 subfamily members function in RNA editing (Barkan and Small, 2014), a post-transcriptional  
122 modification of organelle transcripts, including C-to-U, U-to-C and A-to-I editing  
123 (Chateigner-Boutin and Small, 2010; Ruwe et al., 2013; Ruwe et al., 2019).

124 Kernel size and carbohydrate import into kernels directly determine the grain yield of  
125 maize, therefore, elucidation of the genetic basis of kernel traits could provide favorable  
126 alleles to enhance maize breeding. In a previous study, a maize recombinant inbred line (RIL)  
127 population was developed from a cross between two diverse parents, Zheng58 and SK (Small  
128 Kernel), which show dramatic variation in kernel weight; and a major kernel weight QTL,  
129 *qKW9*, was identified (Raihan et al., 2016; Yang et al., 2019). In this study, we mapped and  
130 cloned the causative gene underlying *qKW9*, and identified it as a PLS-DYW type PPR protein.  
131 We found that *qKW9* is required for C-to-U editing at position 246 of *NdhB*, a  
132 chloroplast-encoded subunit of the NDH complex. Functional characterization revealed that  
133 C-to-U editing of *NdhB* is crucial for the accumulation of its protein product as well as the  
134 activity of the NDH complex. Impairment of this complex led to lower photosynthetic  
135 efficiency and a corresponding yield loss of maize in field trials.

136

## 137 RESULTS

### 138 Fine mapping and validation of *qKW9*

139 *qKW9* is a major QTL regulating maize kernel weight identified in the ZHENG58×SK RIL  
140 population (Raihan et al., 2016). Near-isogenic lines (NILs) harboring the *qKW9* allele from  
141 SK or ZHENG58 were screened from RIL-derived heterogeneous inbred families (HIFs) and  
142 used to fine map *qKW9*. In contrast to *dek* mutants, which have dramatic kernel weight loss  
143 due to defects in the embryo and/or endosperm, the NIL-SK kernels weighed only about 3g  
144 less per hundred kernels, compared to NIL-ZHENG58, and their kernel morphology, starch  
145 granule structure and plant morphology were similar (Figure 1, Table S1). Thus, the kernel  
146 development of NIL-SK plants was not strongly affected. Interestingly, two-week-old  
147 seedlings of NIL-SK were smaller than NIL-ZHENG58, possibly as a result of less nutrition  
148 from smaller kernels for their heterotrophic growth (Figure 1B). However, at the mature stage,  
149 NIL-SK, and NIL-ZHENG58 plants had similar plant architecture (Figure 1A and 1C).  
150 NIL-SK plants had the same kernel row number but fewer kernels per row compared to  
151 NIL-ZHENG58 plants, resulting in smaller ears with fewer kernels (Figure 1D and Table 1).

152 In previous study, line KQ9-HZAU-1341-1 from ZHENG58×SK RIL population with  
153 residual heterozygosity was used as founder line to fine map *qKW9* (Raihan et al., 2016; Liu  
154 et al., 2018). After three generations self-cross and screening against descendents of  
155 KQ9-HZAU-1341-1, several recombinant HIFs were obtained. Among the HIFs, F1H5 was  
156 used to generate recombination populations to screen for new recombinants to fine map *qKW9*  
157 in this study. Eight recombinants was identified by screening 685 F1H5 descendents and they  
158 were self-crossed for further analysis (Figure S1). By comparing Hundred Kernel Weight  
159 (HKW) of the homozygous progenies from all recombinants, *qKW9* was fine mapped to a ~  
160 20kb region defined by markers M3484 and M3506 (156.65Mb and 156.67Mb, respectively in  
161 B73 RefGen v4) (Figure 2A and Fig S1). Three genes (*Zm00001d04850*, *Zm00001d048451*,  
162 and *Zm00001d048452*) were annotated within this region in B73 RefGen v4 (Figure 2B).  
163 Several SNPs were found in *Zm00001d04850*, however they were all synonymous. The second  
164 gene, *Zm00001d048451*, had a 13bp-CDS-deletion in SK, possibly leading to loss of function



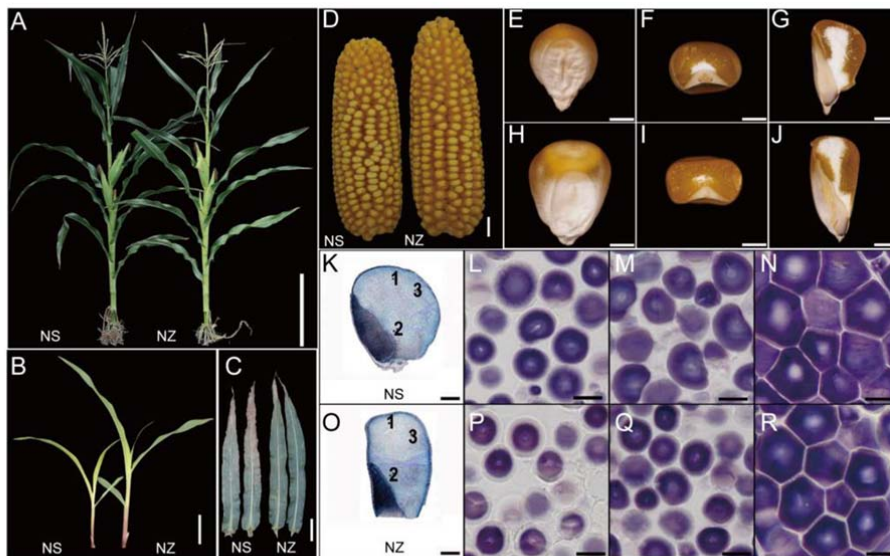

**Figure 1.** Plant and kernel morphology of NIL-SK and NIL-Zheng58. **(A)** NIL-SK (NS) and NIL-Zheng58 (NZ) had very similar plant architecture, Bar=20cm. **(B)** NIL-SK (NS) two-week old seedlings were smaller than NIL-Zheng58 (NZ). Bar=4cm. **(C)** Leaf senescence was greater in NIL-SK (NS) at 30 days after pollination compared to NIL-Zheng58. Bar=10cm. **(D)** Ears of NIL-SK (NS) were smaller than in NIL-Zheng58 (NZ). Bar=1cm. **(E) to (J)** Mature kernels of NIL-SK (E-G) were smaller than in NIL-Zheng58 (H-J). Whole kernels of NIL-SK and NIL-Zheng58 (**[E]** and **[H]**). Bar=2mm; transverse section of kernel of NIL-SK and NIL-Zheng58(**[F]** and **[I]**). Bar=2mm; Longitudinal section of kernel of NIL-SK and NIL-Zheng58(**[G]** and **[J]**). Bar=2mm; **(K) to (R)** Similar starch structure in endosperms of mature kernels of NIL-SK and NIL-Zheng58. Whole longitudinal section stained with iodine solution of kernels of NIL-SK and NIL-Zheng58 (**[K]** and **[O]**), 1, 2, 3 indicate the crown, farinaceous and keratin endosperm regions, respectively. Bar=1mm; **(L) to (N)** correspond to regions 1, 2, 3 in **(K)**; and **(P) to (R)** correspond to regions 1, 2, 3 in **(O)**. Bar=10μm.

165 (Figure 2C). We failed to amplify the third gene, *Zm00001d048452*, from both SK and  
166 ZHENG58, and therefore, screened SK and ZHENG58 BAC libraries to search for sequence  
167 variation. However, sequence alignment and annotation revealed that *Zm00001d048452* was  
168 absent from both SK and ZHENG58, and there were no additional annotated genes within the  
169 *qKW9* locus, although there were some large-fragment insertions or deletions in the intergenic  
170 regions (Figure 2B). These results were further verified using the assembled SK genome (Yang  
171 et al., 2019). Of the two remaining candidates, *Zm00001d048450* displayed neither change in  
172 expression level nor pattern (Figure S2A), which together with its lack of non-synonymous  
173 SNPs suggested *Zm00001d048451* to be the causative gene of *qKW9*.

174 To validate *Zm00001d048451* as the gene underlying *qKW9*, we adopted the

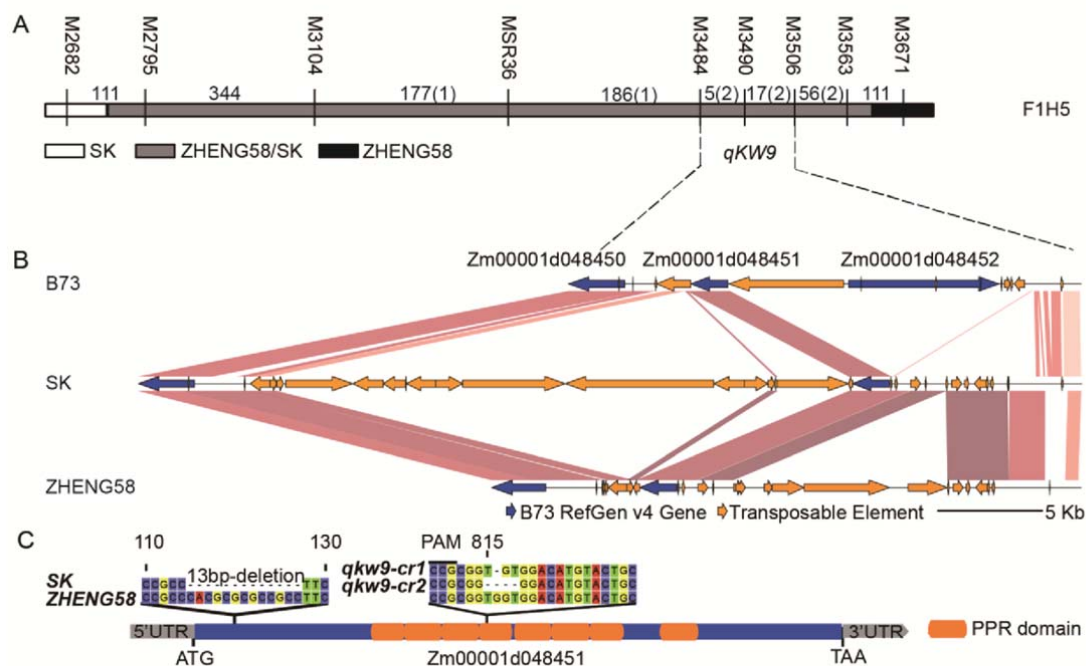

**Figure 2.** Fine mapping and gene structure of *qKW9*. **(A)** Mapping delimits *qKW9* to the region between M3484 and M3506 on chromosome 9. F1H5 which derives from ZHENG58 × SK RIL population is the founder line for screening heterozygous inbred families (HIFs) for fine mapping *qKW9*. Progeny tests of kernel weight were conducted on the resulting recombinant families. White bar represents the homozygous chromosomal segment for SK, grey bar represents the heterozygous chromosomal segment for ZHENG58 × SK, black bar represents the homozygous chromosomal segment for ZHENG58. The graphical genotype represents F1H5. Numbers between markers represent physical distances (Kb) between the adjacent markers and numbers in brackets represent the number of recombinants. **(B)** Gene annotations in the region of *qKW9* of B73, SK, and Zheng58. Sequences were obtained by sequencing BACs covering *qKW9* from SK and ZHENG58 genome BAC libraries, respectively. Zm00001d048452 was absent in both SK and ZHENG58. Two candidate genes - Zm00001d048450 and Zm00001d048451 - were identified in *qKW9*. **(C)** Zm00001d048451 is a 1.8kb intron-less gene with 8 pentatricopeptide repeats and a 13bp-deletion was identified in coding region of Zm00001d048451 in SK. CRISPR/Cas9 was used to create knockout mutants with a single guide sequence (the 20bp sequence adjacent to PAM) targeting Zm00001d048451 in the inbred C01. Two mutated alleles - *qkw9-cr1* and *qkw9-cr2* - were identified by sequencing the first-generation (T<sub>0</sub>) plants and used for further genetic analysis.

175 CRISPR/Cas9 system to create knockout mutants (Figure 2C). Editing of *qKW9* was  
 176 identified by Sanger sequencing of T<sub>0</sub> transgenic plants, and two null mutants, *qKW9-cr1*,  
 177 carrying a 1bp-deletion, and *qKW9-cr2*, carrying a 4bp-deletion, were used for subsequent  
 178 analysis (Figure 2C and Figure 3). For both alleles, we found that kernel weight and ear  
 179 weight were reduced compared to their corresponding wild type (Figure 3), demonstrating



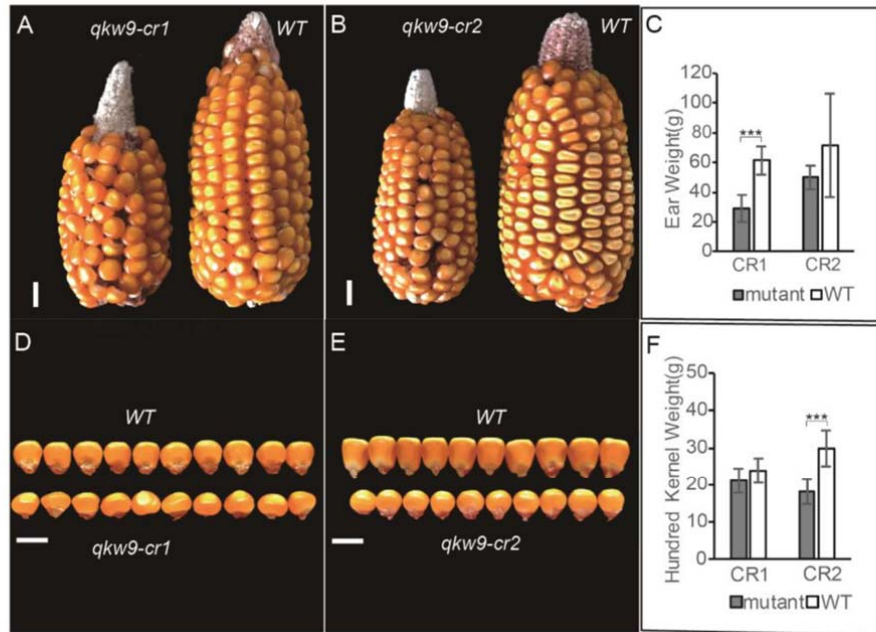

**Figure 3.** Two CRISPR/Cas9 knockout mutants of *Zm00001d048451-qkw9-cr1* and *qkw9-cr2*-produced smaller ears and smaller kernels than wild type. Each mutant is shown alongside its corresponding wild type segregant from a single Cas9-free T<sub>1</sub> generation plant. (A) and (B) comparison of ears produced by CRISPR/Cas9 mutants (left) and WT (right). *qkw9-cr1* (left) and wild type (right) in (A) and *qkw9-cr2* (left) and wild type (right) in (B). Bar=1cm. (D) and (E) kernels produced by CRISPR/Cas9 mutants (lower row) were smaller than WT (upper row). *qkw9-cr1* (lower) and wild type (upper) in (D) and *qkw9-cr2* (lower) and wild type (upper) in (E). Bar=1cm. (C) and (F) show reductions in ear weight (C) and kernel weight (F) of CRISPR/Cas9 knockout mutants. Data are shown as mean  $\pm$  SD (n=6). \*\*\* P < 0.001.

180 that *Zm00001d048451* was indeed the causative gene of *qKW9*.

181 ***qKW9* is highly expressed in leaf, and encodes a chloroplast protein involved in *NdhB***

182 **RNA editing**

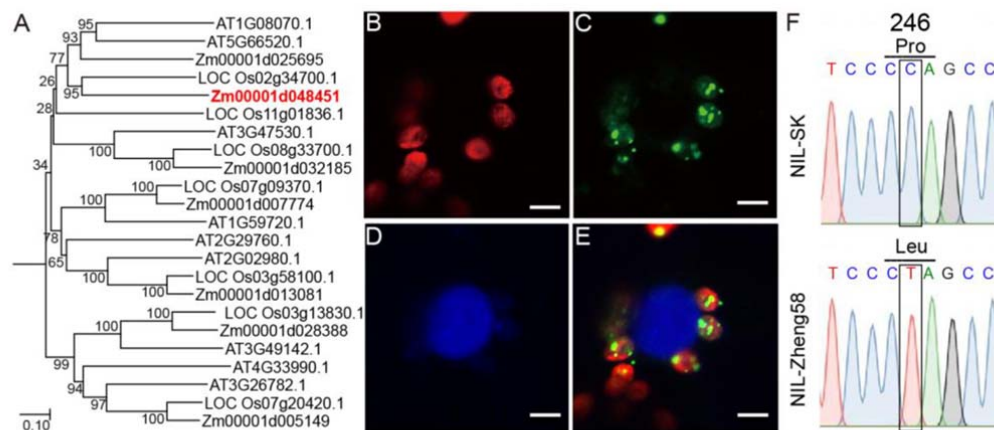

**Figure 4.** Characterization of *qKW9/Zm00001d048451*. **(A)** Phylogenetic tree of maize, Arabidopsis and rice PLS-E, PLE-E+, and PLS-DYW Pentatricopeptide Repeat genes predicted to localize in chloroplast/plastid by TargetP. **(B)** Autofluorescence of chlorophyll (red). **(C)** *qKW9*-GFP fusion protein (green) in green puncta within plastids **(D)** DAPI staining (blue) of nuclei **(E)** Overlay of **(B)**, **(C)** and **(D)**. Scale bar=5  $\mu$ m. **(F)** Allele in NIL-SK of *Zm00001d048451* fails to edit C to U in 246<sup>th</sup> codon of *NdhB* gene. C-to-U editing in *NdhB*-246 results in amino acid change from proline to leucine. Pro, proline; Leu, leucine.

183 *Zm00001d048451/qKW9* is predicted to encode a DYW subgroup pentatricopeptide repeat  
 184 (PPR) protein with eight putative PPR motifs (Figure 2C). An Arabidopsis ortholog,  
 185 *AT5G66520* (Figure 4A) encodes a DYW subgroup protein with ten PPR motifs and was  
 186 designated *Chloroplast RNA Editing Factor 7 (CREF7)*, functioning in *Ndh* editing (Yagi et al.,  
 187 2013). In order to address if *qKW9* is also involved in chloroplast RNA editing, we analyzed its  
 188 expression and subcellular localization. Real-time PCR of *qKW9* revealed a considerably  
 189 higher expression level in leaf than in other tissues (Figure S2B). *qKW9* expression was  
 190 detected in all leaf-related tissues, and its expression level (13.9-87.6 FPKM) was much higher  
 191 than in other tissues (0-12.8 FPKM) (Stelpflug et al., 2016). To test the subcellular localization  
 192 of *qKW9*, we transiently expressed a *qKW9*-GFP fusion protein in tobacco, and found  
 193 localization in the stroma of chloroplasts (Figure 4B-4E), agreeing with a chloroplast prediction  
 194 by TargetP (Emanuelsson et al., 2007).

195 To evaluate RNA editing by *qKW9*, leaves from NIL-SK and NIL-ZHENG58 plants  
 196 before and after pollination were collected for total RNA sequencing. By comparing editing  
 197 frequencies between NIL-SK and NIL-ZHENG58, six loci putatively edited by *qKW9* were

198 identified with  $p$ -value  $< 0.05$  and mean editing frequency difference  $> 5\%$  (Table 2). Three of  
199 these loci at chloroplast genome positions 90736, 132001, and 65407 (B73 RefGen v4), had  
200 striking editing differences between NIL-SK and NIL-ZHENG58, with close to 100% editing  
201 in NIL-ZHENG58 but almost none in NIL-SK at all stages tested (Table 2). Position 65407 is  
202 in an intergenic region, whereas positions 90736 and 132001 are in the 246<sup>th</sup> codon of  
203 *GRMZM5G876106* and *GRMZM5G810298*, respectively (Table 2). These genes are the two  
204 copies of *NdhB* in the chloroplast genome, and their C-to-U editing changes the 246<sup>th</sup> amino  
205 acid from proline to leucine. Thus, the sites edited by *qKW9* were designated as *NdhB-246*.  
206 We confirmed the *NdhB-246* editing difference by Sanger sequencing in NIL-SK and  
207 NIL-ZHENG58 (Figure 4F). We also investigated the editing frequency of *NdhB-246* in  
208 leaves of our two CRISPR/Cas9 null mutants, as expected, *NdhB-246* editing being abolished  
209 in both mutants (data not shown). These results demonstrate that *qKW9* is essential for  
210 *NdhB-246* editing.

211 RNA editing defects may directly alter protein function or affect its ability to form  
212 complexes with other proteins (Hammani et al., 2009). *NdhB* encodes a subunit of the NDH  
213 complex (Laughlin et al., 2019), so we asked if this complex accumulates in the null *qKW9*  
214 background using protein blots probed with antibodies against NdhH to monitor  
215 accumulation of the complex. In NIL-SK, the level of NdhH was reduced to less than 25% of  
216 NIL-ZHENG58 (Figure 5), suggesting that *NdhB-246* RNA editing by *qKW9* is important for  
217 normal accumulation of the NDH complex.

### 218 **C-to-U editing of *NdhB-246* is essential for optimal activity of NDH complex, electron** 219 **transport rate and non-photochemical quenching induction**

220 The chloroplast NADH dehydrogenase (NDH) complex transfers electrons originating  
221 from Photosystem I (PSI) to the plastoquinone pool, while concomitantly pumping protons  
222 across the thylakoid membrane (Strand et al., 2017). Its activity can be monitored as a  
223 transient increase in chlorophyll fluorescence, reflecting plastoquinone reduction after turning  
224 off actinic light (AL) (Burrows et al., 1998; Shikanai et al., 1998). In Arabidopsis, several  
225 nuclear mutants affecting NDH activity function in RNA processing of NDH subunit

226 transcripts. For instance, *Chlororespiratory Reduction 2 (CRR2)* functions in the intergenic  
227 processing of chloroplast RNA between *rps7* and *NdhB* (Hashimoto et al., 2003). A null allele  
228 of *CRR2* lacks NDH activity, and the post-illumination increase in chlorophyll fluorescence is  
229 undetectable, with a similar phenotype being observed in the tobacco *NdhB* mutant  
230 (Hashimoto et al., 2003).

231 To check whether *qKW9* impaired NDH activity, we monitored chlorophyll fluorescence  
232 using the post-illumination method (Burrows et al., 1998; Shikanai et al., 1998). Figure 6A  
233 shows a chlorophyll fluorescence trace from wild-type maize and *qkw9-cr1* and *qkw9-cr2*. In  
234 both *qkw9-cr1* and *qkw9-cr2*, the post-illumination increase of chlorophyll fluorescence was  
235 reduced, indicating that NDH activity was diminished in the null *qKW9* background, and that  
236 the Leu residue at position 246 of NdhB protein is required for NDH accumulation and  
237 activity. We next measured non-photochemical quenching (NPQ), a chlorophyll fluorescence  
238 parameter indicative of the level of thermal dissipation. NPQ was induced with increasing light

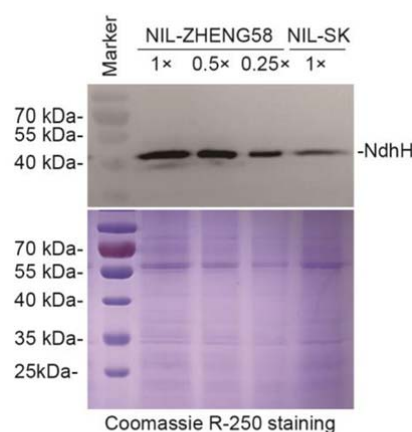

**Figure 5.** Protein blot analysis of the NDH complex. Chloroplast membrane protein was extracted with a commercial kit and protein samples were quantified with BCA protein assay. 1× sample amount equals 40 μg protein. Antibody against NdhH was used to indicate the amount of NDH complex. Chloroplast membrane protein from NIL-ZHENG58 was loaded a series of dilutions as indicated. Specific bands corresponded in size of NdhH protein (expected in 45 kDa, apparent in 49 kDa). Signals in NIL-ZHENG58 declined along with the dilution. The level of NdhH in NIL-SK was reduced to less than 25% of NIL-ZHENG58. Coomassie R-250 staining was used to show the proteins separated by electrophoresis as a loading control.

239 intensity in both *qkw9-cr1* and wild type prior to saturation of the ETR (Figure 6B). However,  
240 its induction in *qkw9-cr1* was significantly lower at light intensities of 2413 μmol<sup>-2</sup>m<sup>-1</sup>,



241 indicating that thermal dissipation was impaired in *qkw9-cr1* (Figure 6B). ETR represents the  
 242 relative flow of electrons through PSII during steady-state photosynthesis. It increases with  
 243 increases in light intensity until a point at which it cannot be further increased – termed its  
 244 saturation point. For both wild-type and *qkw9-cr1*, the saturation point was over 400  
 245  $\mu\text{mol}/\text{m}^2\text{s}$  (Figure 6C). Whilst, ETR was not affected in *qkw9-cr1* at a low light intensities of  
 246  $\sim 100 \mu\text{mol}/\text{m}^2\text{s}$  (Figure 6C), it tended to be lower in *qkw9-cr1* at intensities above this  
 247 (significantly so at 200 and 2400  $\mu\text{mol}/\text{m}^2\text{s}$ ). These altered ETR activities are consistent  
 248 with the overall reduced grain yield in NIL-SK considering that light intensity is far in excess

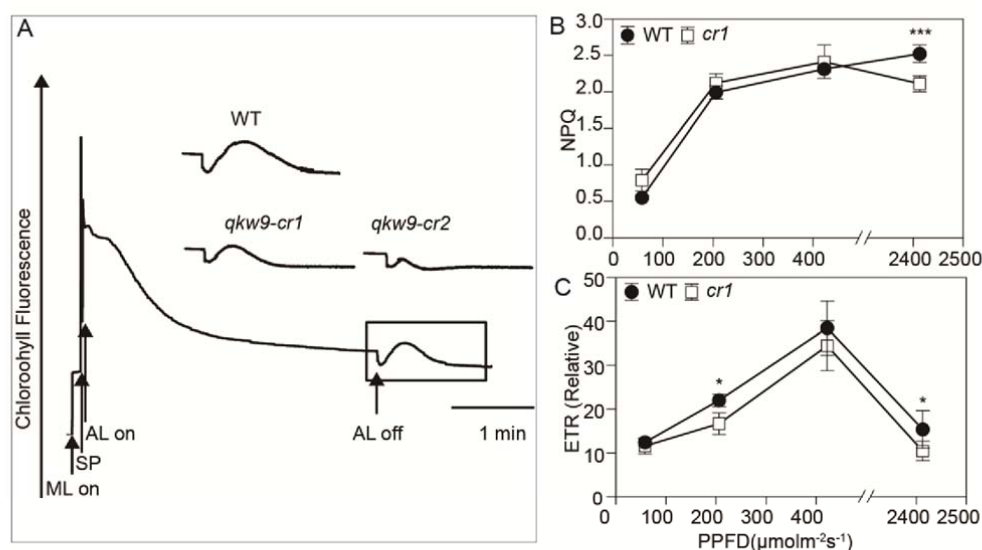

**Figure 6. NDH activity monitoring and NPQ and ETR in null mutants of qKW9. (A)** Monitoring of NDH activity using chlorophyll fluorescence analysis for *qkw9-cr1* and *qkw9-cr2* mutants. The curve shows the typical change trace of chlorophyll fluorescence *in vivo* as the NDH complex catalyzes the post-illumination reduction of the plastoquinone pool (Okuda et al., 2007). The change in post-illumination fluorescence ascribed to NDH activity was different between WT and mutants. Insets are magnified traces from the boxed area. ML, measuring light; AL, actinic light; SP, a saturating pulse of white light. **(B)** NPQ was induced by light intensity in both *cr1* and WT, but it was significantly lower in *cr1* under photon flux density of 2413  $\mu\text{mol}$  of photons  $\text{m}^{-2}\text{s}^{-1}$ . **(C)** relative ETR (rETR) under different photon flux densities. rETR in *cr1* and WT reached maximum when the light intensity was 422  $\mu\text{mol}$  of photons  $\text{m}^{-2}\text{s}^{-1}$ . It was significantly lower in *cr1* under the photon flux density of 206  $\mu\text{mol}$  of photons  $\text{m}^{-2}\text{s}^{-1}$  and 2413  $\mu\text{mol}$  of photons  $\text{m}^{-2}\text{s}^{-1}$ . The rETR is depicted relative to a maximal value of  $\phi_{\text{PSII}} \times \text{PPFD}$  (photon flux density,  $\mu\text{mol}$  of photons  $\text{m}^{-2}\text{s}^{-1}$ ). Data are shown as mean  $\pm$  SD ( $n=6$ ).

249 of 100  $\mu\text{mol}/\text{m}^2\text{s}$  in the field. These findings considerably differ from studies in Arabidopsis

250 and tobacco, since multiple mutant analyses have demonstrated that NDH does not function  
251 to trigger thermal dissipation in PSII in these species (Burrows et al., 1998; Munekage et al.,  
252 2004).

### 253 ***qKW9* controls kernel weight by regulating photosynthesis**

254 Genetic evidence suggests that physiological functions of cyclic electron transport (CET)  
255 around Photosystem I (PSI) are essential for efficient photosynthesis and plant growth  
256 (Munekage et al., 2004). The physiological role of CET is to protect PSII under intense light  
257 via  $\Delta$ pH-dependent thermal dissipation in PSII, as well as to act as an ATP generator in  
258 photosynthesis (DalCorso et al., 2008; Alric and Johnson, 2017). Our results suggest that  
259 reduced activity of the NDH complex in maize affected NPQ and ETR. We therefore asked  
260 how photosynthesis and carbon assimilation were affected by changes in NDH activity? We  
261 measured the fresh weight of developing kernels of NIL-SK and NIL-ZHENG58 under field  
262 conditions, and investigated several photosynthesis-related parameters (Figure 7). Fresh  
263 weight of NIL-SK kernels was similar to NIL-ZHENG58 before 30 DAP (Figure 7A).  
264 However, kernels of NIL-SK reached their maximum fresh weight at 30DAP, while  
265 NIL-ZHENG58 kernels continued to gain weight until 35 DAP, suggesting that carbon  
266 deposition in kernels was greater in NIL-ZHENG58 at 35 DAP (Figure 7A). Consistent with  
267 this observation, leaves of NIL-SK had more severe senescence at 30 DAP compared to  
268 NIL-ZHENG58, indicating decreased source strength in the NIL-SK plants (Figure 1C).  
269 NIL-SK also had significantly lower net photosynthesis than NIL-ZHENG58 at 22DAP and  
270 30DAP (Figure 7B). Consistently, stomatal conductance and transpiration rate were similarly  
271 lower in NIL-SK than in NIL-ZHENG58 (Figure 7C-7D). The lower photosynthetic capacity  
272 of NIL-SK, coupled with the potential compensatory fact that less kernels were produced per  
273 ear in this line (Table 1), may explain why the fresh weight of NIL-SK were not significantly  
274 lower than NIL-ZHENG58 at 22DAP and 30DAP (Figure 7A). In addition, the chlorophyll  
275 content (SPAD value) and the maximum photochemical efficiency (Fv/Fm) were invariant  
276 between the NILs (Figure 7E-7F), indicating that the differences in the net photosynthetic  
277 rates might not result from a different level of photosynthesis potential. Accordingly, the

278 photosynthetic rate was also significantly lower in *qKW9-cr1* than WT at 30DAP under field  
 279 conditions (*qKW9-cr1*:  $17.35 \pm 2.10 \mu\text{mol CO}_2 \text{m}^{-2} \text{s}^{-1}$ , Wild type:  $29.68 \pm 3.56 \mu\text{mol CO}_2 \text{m}^{-2} \text{s}^{-1}$ ,  
 280  $n=6$ ). We conclude that impaired NDH activity affected both net photosynthesis and the

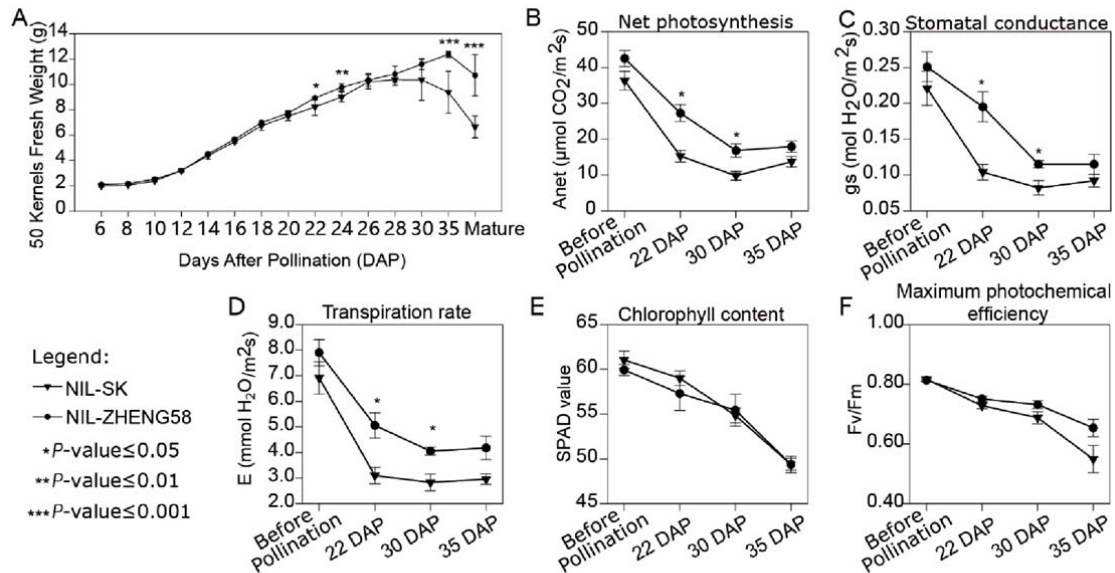

**Figure 7.** Grain filling and photosynthesis measurement in NIL-SK and NIL-Zheng58. **(A)** Time courses of fresh weight of 50 kernels of NIL-SK and NIL-Zheng58. The fresh weight of NIL-SK and NIL-ZHENG58 reached the maximum at 30 DAP and 35 DAP, respectively. **(B)** to **(E)** Time courses of photosynthesis-rate related parameters of NIL-SK and NIL-Zheng58. Net photosynthesis **(B)**, stomatal conductance **(C)**, and transpiration rate **(D)** were significantly lower in NIL-SK than NIL-ZHENG58 at 22 DAP and 30 DAP; **(E)** chlorophyll content and **(F)** maximum photochemical efficiency did not show significant between genotype differences at any of the four stages tested. Data are shown as mean  $\pm$  SD ( $n=6$ ).

281 duration of active photosynthesis, resulting in smaller ears and kernels in NIL-SK.

282

## 283 **DISCUSSION**

### 284 ***qKW9* encodes a PPR gene responsible for C-to-U editing of NdhB**

285 The maize kernel has been of interest to researchers as a model system for the study of  
286 development and genetics for a century. Numerous kernel mutants have been identified  
287 (Neuffer and Sheridan, 1980; Sheridan and Neuffer, 1980; Clark and Sheridan, 1991), and in  
288 recent years, many mutants that result in dramatically reduced kernel size, and seedling  
289 lethality have been identified. In many cases, *PPR* genes are responsible for these phenotypes,  
290 due to their function in organellar gene expression. Generally, null alleles of *PPR* genes in  
291 previous studies produce kernels that are with obvious development abnormality at early stages  
292 and are easily distinguished from normal kernels on self-crossed F<sub>1</sub> ears due to their smaller  
293 size, pale pericarp, flat or shrunken appearance (Manavski et al., 2012; Sosso et al., 2012; Li et  
294 al., 2014; Sun et al., 2015; Xiu et al., 2016; Cai et al., 2017; Chen et al., 2017; Qi et al., 2017;  
295 Ren et al., 2017; Dai et al., 2018; Li et al., 2018; Sun et al., 2019). Unlike these kernel mutants,  
296 kernels produced by null allele of *qKW9* are similar in appearance and viability although  
297 smaller in size comparing to wild type, and kernel weight is determined by genotype of  
298 maternal plant rather than kernel genotype. *qKW9* is the first identified C-to-U editing factor in  
299 the maize chloroplast that has a quantitative rather than qualitative effect on kernel and ear size.  
300 This difference stems from the involvement of *qKW9* in the abundance of the NDH complex,  
301 which is known to play a regulatory role in photosynthesis (Nashilevitz et al., 2010; Peltier et  
302 al., 2016). Based on results from this study, it is possible that variants of other yet-unidentified  
303 RNA editing factors responsible for the 11 C-to-U editing sites in maize *ndh* transcripts will  
304 also affect kernel and ear size in a quantitative way. Indeed, studies in *Arabidopsis* have  
305 identified many *PPR* genes affecting *ndh* expression, by focusing on changes in chlorophyll  
306 fluorescence related to NDH activity (Kotera et al., 2005; Okuda et al., 2007; Hammani et al.,  
307 2009; Okuda et al., 2010). Similar research in maize may help us rapidly identify potential  
308 QTL, circumventing the tedious work of fine mapping.

309 Grains are typical sink organs -i.e. they are net receivers of photoassimilates from  
310 photosynthetically active source tissues - and a considerable number of studies suggest that

311 enhancing photosynthetic efficiency could increase the productivity of crops (Sonnewald and  
312 Fernie, 2018; South et al., 2019; Wu et al., 2019). In the light reactions of photosynthesis,  
313 linear electron transport (LET) from water to  $\text{NADP}^+$  does not fully satisfy the ATP/NADPH  
314 production ratio required by the Calvin-Benson cycle and photorespiration (Yin and Struik,  
315 2018). Cyclic electron transport (CET) around photosystem I (PSI) has, therefore, been  
316 considered as a candidate for augmented ATP synthesis in response to fluctuating demand  
317 during photosynthesis (Rumeau et al., 2007; DalCorso et al., 2008; Nakamura et al., 2013). In  
318 PSI CET, electrons are recycled around PSI generating  $\Delta\text{pH}$  and consequently ATP without a  
319 concomitant accumulation of NADPH (Shikanai, 2007; Munekage and Taniguchi, 2016). In  
320 Arabidopsis, two CET pathways have been identified by genetics. The main pathway depends  
321 on PROTON GRADIENT REGULATION 5 (PGR5)/PGR5-LIKE PHOTOSYNTHETIC  
322 PHENOTYPE 1 (PGRL1) proteins, whereas the minor pathway is mediated by the  
323 chloroplast NADH dehydrogenase-like (NDH) complex (Munekage et al., 2004). The  
324 Arabidopsis *pgr5* mutant is defective in PSI CET and was discovered by screening for  
325 reduced non-photochemical quenching (NPQ) of chlorophyll fluorescence (Munekage et al.,  
326 2002; DalCorso et al., 2008). However, as in tobacco, the Arabidopsis *chlororespiratory*  
327 *reduction (crr)* mutants and *organelle transcript processing (otp)* mutants defective in  
328 chloroplast NDH did not show any marked phenotype (Burrows et al., 1998; Hashimoto et al.,  
329 2003; Munekage et al., 2004; Hammani et al., 2009; Okuda et al., 2010).

330 Plastid genomes encode 11 subunits (NdhA to NdhK) forming the core of the membrane  
331 arm of the L-shaped structure of the NDH complex (Laughlin et al., 2019). Multiple PPR  
332 genes regulate expression of *ndh* genes in Arabidopsis. These PPR genes are either  
333 responsible for splicing of polycistronic transcripts, or site-specific C-to-U RNA editing  
334 (Hashimoto et al., 2003; Munekage et al., 2004; Kotera et al., 2005; Okuda et al., 2007;  
335 Hammani et al., 2009; Okuda et al., 2009; Okuda et al., 2010). C-to-U RNA editing is  
336 important in organelle gene expression in various organisms, although the efficiency varies in  
337 different organs and at different developmental stages (Maier et al., 1995; Peeters and Hanson,  
338 2002). C-to-U RNA editing in Arabidopsis can generate translational initiation codons, as in



339 *CRR4* (Kotera et al., 2005) or cause amino acid alterations, as in *CRR21*, *CRR22*, *CRR28*,  
340 *OTP82*, *OTP84* and *OTP85* (Okuda et al., 2007; Hammani et al., 2009; Okuda et al., 2009;  
341 Okuda et al., 2010). Editing of *NdhB-246* in leaf tissues is near 100% in maize, suggesting that  
342 it is important for the function of NdhB protein (Peeters and Hanson, 2002). *NdhB-246* editing  
343 also occurs in tobacco and rice (Tsudzuki et al., 2001). Therefore, C-to-U editing of *NdhB-246*  
344 appears crucial to its function. The *qKW9* QTL characterized in our study is the first RNA  
345 editing factor that has been linked to C-to-U editing of *NdhB-246*. Our results clearly indicate  
346 that the abolition of C-to-U editing in *NdhB-246* impairs accumulation of the NDH complex *in*  
347 *vivo*.

### 348 **Cyclic electron transport via NDH complex in C<sub>4</sub> and C<sub>3</sub>**

349 Chloroplast NDH mediation of CET around PSI was first reported in tobacco following  
350 disruption of *NdhB* (Shikanai et al., 1998). Knockout lines of *ndh* genes were created by  
351 plastid transformation in tobacco. Mutants defective in expression of chloroplast *ndh* genes  
352 were isolated in Arabidopsis (Hashimoto et al., 2003). However, both knockout lines of *ndh*  
353 genes in tobacco and mutants with impaired NDH activity in Arabidopsis lack morphological  
354 phenotypes (Hashimoto et al., 2003; Munekage et al., 2004; Okuda et al., 2007; Hammani et  
355 al., 2009; Okuda et al., 2009; Okuda et al., 2010). So, the general conclusion has been that  
356 mutants defective in NDH do not show a clear phenotype and NDH is dispensable at least  
357 when plants are grown in controlled environments. Analysis of this observation leads to the  
358 conclusion that NDH does not function to generate a pH gradient in order to trigger thermal  
359 dissipation in PSII. The observations we present here, where we found that *qKW9* is required  
360 for the expression of *NdhB* and optimal activity of the NDH complex in maize, suggest that  
361 this conclusion may not hold in all species. Namely in the null mutant genotypes, light  
362 intensity-dependent ETR and NPQ were obviously affected. We additionally observed more  
363 severe leaf senescence in NIL-SK, a phenonomon that may result from impaired thermal  
364 dissipation, since NPQ induction under high-intensity light is suppressed as compared with  
365 NIL-ZHENG58. Moreover, the overall rate of photosynthesis was also reduced in the null  
366 *qKW9 mutant*, leading to significantly reduced ear and kernel size.

367 Our study of *qKW9* provides a possible explanation for the apparent contradiction of  
368 these observations, in suggesting that CET via the NDH complex is more important in C<sub>4</sub>  
369 than in C<sub>3</sub> plants. CET around photosystem I is critical for balancing the photosynthetic  
370 energy budget of the chloroplast by generating ATP without net production of NADPH  
371 (Ishikawa et al., 2016a). C<sub>4</sub> plants have higher ATP requirements than C<sub>3</sub> plants (Ishikawa et  
372 al., 2016b), rendering the ATP supply by CET particularly important, imply that during the  
373 evolution of NADP-malic enzyme-type C<sub>4</sub> photosynthesis in the C<sub>4</sub>-like genus *Flaveria*, CET  
374 was promoted by markedly increasing expression of both PGR5/PGRL1 and NDH subunits  
375 (Nakamura et al., 2013). The NDH subunit, however, increases markedly in bundle sheath  
376 cells with the activity of the C<sub>4</sub> cycle while PGR5/PGRL1 increases in both mesophyll and  
377 bundle sheath cells in *Flaveria* and other C<sub>4</sub> species, implying that the NDH complex  
378 provides a considerable role in the establishment of C<sub>4</sub> photosynthesis (Nakamura et al.,  
379 2013). Previously, it was also shown that NDH plays a central role in driving the  
380 CO<sub>2</sub>-concentrating mechanism in C<sub>4</sub> photosynthesis (Takabayashi et al., 2005; Andrews,  
381 2010). In addition, the NDH complex has been experimentally demonstrated to be a  
382 high-efficiency proton pump, increasing ATP production by cyclic electron transport (Strand  
383 et al., 2017). Ishikawa et al. report that NDH-suppressed C<sub>4</sub> plants are characterized by  
384 consistently decreased CO<sub>2</sub> assimilation rates, impaired proton translocation across the  
385 thylakoid membrane and reduced growth rates (Ishikawa et al., 2016a). Results from our  
386 study provide direct evidence that the NDH complex is important to C<sub>4</sub> photosynthesis. As  
387 such comparison of our data with that from a recent study in *Arabidopsis* which showed that  
388 NDH-dependent cyclic electron transport around PSI contributes to the generation of proton  
389 motive force only in the weak mutant of *pgr5* (Nakano et al., 2019), suggests that it is more  
390 important to C<sub>4</sub> than C<sub>3</sub> photosynthesis.

391 An alternative explanation could be the difference in the study conditions. In our study,  
392 growth and photosynthesis measurement are conducted in the field where the plants  
393 experience naturally fluctuating light, humidity, temperature, etc. Fluctuating elements may  
394 give rise to stress to photosystems. Impairment of NDH-dependent PSI cyclic electron

395 transport causes a reduction in photosynthetic rate under fluctuating light, leading to  
396 photoinhibition at PSI and consequently to reductions in plant biomass in rice (Yamori et al.,  
397 2016). It is worth noting that there are studies stressing the role that NDH complex plays in  
398 CET under stresses (Horváth et al., 2000; Wang et al., 2006; Yamori et al., 2015). Indeed the  
399 conclusions that the NDH complexes role in CET is dispensable come from studies of tobacco  
400 and Arabidopsis grown in growth chambers rather than the field, resulting in an  
401 under-estimation of the importance of the NDH complex's regulatory effect on  
402 photosynthesis.

403 In summary, our study identified a maize kernel size QTL which is caused by allelic  
404 variation in *qKW9*, a PLS-DYW type PPR protein. We found that *qKW9* is required for C-to-U  
405 editing at 246<sup>th</sup> codon of *NdhB*, a chloroplast-encoded subunit of the NDH complex. With this  
406 editing pattern previously being recorded occurring concomitantly with the onset of  
407 photosynthetic activity in tobacco (Karcher and Bock, 2002). Functional characterization  
408 revealed that C-to-U editing of maize *NdhB* is crucial for the accumulation of its protein  
409 product as well as the activity of the NDH complex. This study thus challenges current models  
410 of the role of the NDH in photosynthesis, revealing new insights into the regulation of C<sub>4</sub>  
411 photosynthesis and suggesting a novel potential target for crop improvement.

## 412 **METHODS AND MATERIALS**

### 413 **Fine mapping of *qKW9***

414 Multiple major QTL regulating kernel-size-related traits were identified by  
415 multi-environment QTL analysis in ZHENG58×SK RIL population and a major QTL on  
416 chromosome 9 regulating kernel width was designated as *qKW9* in a previous report (Raihan et  
417 al., 2016). To fine-map *qKW9*, the heterogeneous inbred family (HIF) was screened against the  
418 RIL population and RIL line KQ9-HZAU-1341-1 was heterozygous between Marker M2682  
419 (155.83Mb in B73 Ref Gen v4) and Marker M3671 (156.83Mb in B73 RefGen v4) was used  
420 as the founder HIF (Raihan et al., 2016). In a nursery grown in Hainan in 2015, two groups of  
421 homozygous progenies of F1H5, which was a descendant of line KQ9-HZAU-1341-1, were  
422 significantly different in hundred kernel weight (HKW), kernel length (KL), and kernel width

423 (KW). Thus, F1H5 was used as the starting HIF to fine map *qKW9* in this study. In the summer  
424 of 2016, recombinants between Marker M2795 and Marker M3671 were screened against the  
425 F1H5 population. In the winter of 2016, progeny tests were conducted on those recombinant  
426 populations.

427 For genotyping, genomic DNA extraction from young leaf was conducted using the CTAB  
428 protocol for plant tissues. To detect SNP and Indel markers, PCR was conducted in 10  $\mu$ L  
429 reactions with KASP master mix (cat no: KBS-1030-002, LGC), self-made KASP array mix,  
430 and DNA template in 96 well non-transparent plates. KASP array mix was made by mixing  
431 equal volumes of primer F1 (36  $\mu$ M), F2 (36  $\mu$ M), and R (90  $\mu$ M) of a specific SNP marker. For  
432 each reaction, 0.14  $\mu$ L array mix, 1 $\times$ master mix, and 20~200 ng DNA were used. Thermal  
433 cycling was 94  $^{\circ}$ C for 15 minutes to activate the enzyme, followed by 10 cycles of touch down  
434 PCR (denature at 94  $^{\circ}$ C for 20 s, annealing/elongation start with 61  $^{\circ}$ C for 60 s, drop 0.6  $^{\circ}$ C per  
435 cycle), then annealing/elongation for another 26-36 cycles depending on the quality of primers  
436 (denature at 94  $^{\circ}$ C for 20 s, annealing/elongation at 55  $^{\circ}$ C for 60 s). Upon the completion of the  
437 KASP PCR, reaction plates were read by CFX96 Touch<sup>TM</sup> Real-time PCR detection system  
438 and the data was then analysed with the Allelic Discrimination module of BioRad CFX  
439 Manager 3.0. Detected signals were plotted against FAM and HEX fluorescence intensity as a  
440 graph, with samples of the same genotype clustering together. To detect SSR markers, PCR  
441 products were detected by AATI Fragment Analyzer following the manufacturer's instructions.

442 Maize plants were examined under natural field conditions in the experimental fields of  
443 Wuhan (30 $^{\circ}$ N, 114 $^{\circ}$ E), Sanya (18 $^{\circ}$ N, 109 $^{\circ}$ E), and Baoding (39 $^{\circ}$ N, 115 $^{\circ}$ E) in China. The  
444 planting density was 25 cm between adjacent plants in a row and the rows were 60 cm apart.  
445 Field management, including irrigation, fertilizer application, and pest control, essentially  
446 followed the normal agricultural practices. Harvested maize ears were air-dried and then  
447 fully-developed ears were shelled for measuring HKW, KL, and KW as previously reported  
448 (Raihan et al., 2016).

#### 449 **BAC screen, sequence, and *de novo* assembly**

450 BACs covering *qKW9* of both parent lines-SK and ZHENG58- were screened. BAC DNA

451 was prepared using the QIAGEN Large-Construct Kit (Cat no: 12462) following the  
452 manufacturer's instructions but with 150ml overnight-cultured bacterial input. The recovered  
453 DNA was sent to a company (Nextomics Bioscience Co., Ltd, Wuhan, China) for quality  
454 control and library construction. The resulting sequence data was assembled by PacBio's  
455 open-source SMRT Analysis software.

#### 456 **Fresh weight during the filling stage**

457 NILs derived from homozygous progenies of HIF-p11 were used to analyze the grain  
458 filling rate of developing kernels after pollination. NILs with the *qKW9* allele of SK designated  
459 as NIL-SK while NILs with the *qKW9* allele of ZHENG58 designated as NIL-ZHENG58.  
460 Starting from 6 days after pollination (DAP), 50 fresh kernels were harvested and weighted  
461 from 6 ears of each NIL every other day until 30 DAP. At 35 DAP and upon harvest fresh  
462 kernels were also weighed.

#### 463 **Mutagenesis of *qKW9* with CRISPR/Cas9-based gene editing**

464 Two guide RNA sequences (cgggtggtggacatgactg and ctgttctgggatccagct) against *qKW9*  
465 were designed by CRISPR-P 2.0 (<http://crispr.hzau.edu.cn/CRISPR2/>) then cloned into a  
466 CRISPR/Cas9 plant expression vector (Liu et al., 2017a). The backbone of the vector was  
467 provided by WIMI Biotechnology Co., Ltd (Changzhou, China). The vector allows expression  
468 of single guide RNA by the ZmU61 promoter and Cas9 by a maize UBI promoter. The  
469 resulting binary plasmids were transformed into the *Agrobacterium tumefaciens* strain  
470 EHA105 and used to transform maize inbred C01. All constructs were sequence-verified.

#### 471 **Light Microscopy**

472 Whole sections of mature kernels were stained with iodine solution using the method in a  
473 previous report (Zhao et al., 2016). Three different regions of endosperm were examined for  
474 the morphology of starch.

#### 475 **Subcellular localization of *qKW9***

476 *Zm00001d048451* was predicted to locate in chloroplast by TargetP (Emanuelsson et al.,  
477 2007). To verify this, a codon-optimized CDS (optimized by a web tool -  
478 [https://www.genscript.com/codon\\_opt\\_pr.html](https://www.genscript.com/codon_opt_pr.html)) was fused with green fluorescent protein (GFP)



479 and driven by expression from the cauliflower mosaic virus 35S promoter. The binary  
480 vector-pK7FWG2.0-was obtained from Dr. Hannes Claeys (Cold Spring Harbor Laboratory,  
481 USA). The plasmids containing the chimeric genes were transferred into *Agrobacterium*  
482 *tumefaciens* strain GV3101. The resulting strain was co-infiltrated into *Nicotiana benthamiana*  
483 leaves with a strain harboring P19 which was obtained from Dr. Edgar Demesa Arevalo (Cold  
484 Spring Harbor Laboratory, USA) (Lindbo, 2007). Fluorescence signals were detected using  
485 LSM780. DAPI (4,6-diamidino-2-phenylindole) staining solution  
486 ([http://cshprotocols.cshlp.org/content/2007/1/pdb.rec10850.full?text\\_only=true](http://cshprotocols.cshlp.org/content/2007/1/pdb.rec10850.full?text_only=true)) was injected  
487 to the leaf before observing the fluorescence signals. *Agrobacterium* growth and injection  
488 followed the steps described in a previous report (Xu et al., 2015).

#### 489 **Phylogenetic analysis**

490 To identify the PPR genes in maize B73 RefGen v4, protein sequences of B73 RefGen  
491 v4 genes were downloaded from <ftp://ftp.gramene.org/pub/gramene/> (B73 RefGen v4.59).  
492 Then HMMER 3.0 software (Finn et al., 2011) was used to scan all of the annotated  
493 Pentatricopeptide Repeat genes in B73 RefGen v4 with the Hidden Markov (HMM) profile  
494 of PPR domain (PF01535.20, <http://pfam.sanger.ac.uk/>) (E-value < 1). Based on the  
495 C-terminal domain structure, the HMM profiles of E, E+, and DYW domain were rebuilt  
496 using the previously predicted PPR genes in B73 RefGen v3. Then these HMM profiles were  
497 used to scan the PPR genes annotated in B73 RefGen v4  
498 ([ftp://ftp.gramene.org/pub/gramene/CURRENT\\_RELEASE/gff3/zea\\_mays/gene\\_function](ftp://ftp.gramene.org/pub/gramene/CURRENT_RELEASE/gff3/zea_mays/gene_function)).  
499 Then TargetP version 1.1 (<http://www.cbs.dtu.dk/services/TargetP/>) was used to predict the  
500 organelle targeting of these E, E+, and DYW types PPR proteins. Only the chloroplast  
501 targeting genes were kept to conduct the evolutionary analysis with their orthologous genes  
502 in *Arabidopsis* and rice  
503 (<https://download.maizegdb.org/Zm-B73-REFERENCE-GRAMENE-4.0/Orthologs/>). The  
504 evolutionary history was inferred using the Neighbor-Joining method (Saitou and Nei, 1987)  
505 by MEGAX (Kumar et al., 2018). The bootstrap consensus tree inferred from 500 replicates  
506 was taken to represent the evolutionary history of the taxa analyzed (Felsenstein, 1985).

## 507 **Photosynthetic parameters and chlorophyll content measurements**

508 Carbon dioxide assimilation rate, stomatal conductance, and transpiration rate were  
509 measured on fully-expanded maize leaves grown in the field using a portable gas exchange  
510 system (LI-6400XT, LI-COR Inc., USA) as described (Huang et al., 2009; Bihmidine et al.,  
511 2013). The measurements were conducted at an ambient CO<sub>2</sub> concentration of 400 μmol  
512 mol<sup>-1</sup> and light saturation of 2000 μmol m<sup>-2</sup> s<sup>-1</sup>. Leaf photochemical efficiency (Fv/Fm) was  
513 measured on dark-adapted leaves using the FlourPen FP100 chlorophyll fluorescence meter  
514 (Photon System Instruments, Czech Republic). Leaf chlorophyll content was measured using  
515 a chlorophyll meter (SPAD-502, Konica Minolta, Japan). The measurements were performed  
516 before pollination and at 22, 30, and 35 days after pollination (DAP) on eight NIL-SK plants  
517 or NIL-ZHENG58 plants. Means and standard errors (SE) were calculated using Microsoft  
518 Excel. Differences in chlorophyll content and photosynthetic parameters were assessed using  
519 the Student's *t*-test embedded in the Microsoft Excel program, at the *P*-value ≤ 0.05 level.

## 520 **RNA sequencing**

521 To explore the possible RNA editing in leaf by the PPR gene, the ear leaves from NIL-SK  
522 and NIL-ZHENG58 plants before pollination and after pollination (22 days and 30 days) were  
523 collected. Total RNA was isolated from these samples using Direct-zol RNA MiniPrep Plus kit  
524 (Cat no: R2072, ZYMO Research, USA). Libraries were constructed using the Illumina  
525 TruSeq Stranded RNA Kit (Illumina, San Diego, CA, USA) following the manufacturer's  
526 recommendations. Strand-specific sequencing was performed on the Illumina HiSeq 2000  
527 system (paired-end 100-bp reads). The raw reads were trimmed by Trimmomatic v0.36 (Bolger  
528 et al., 2014) to gain high-quality clean reads, and the quality of the clean reads was checked  
529 using the FASTQC program (Andrews, 2010). Next the clean reads were aligned to maize B73  
530 RefGen v4 chloroplast genome by Hisat2 (Kim et al., 2015). Picard tools were subsequently  
531 used to add read groups, sort, mark duplicates, and create index  
532 (<http://broadinstitute.github.io/picard/>). Then the GATK was used to call the sequence variants  
533 by HaplotypeCaller (McKenna et al., 2010). The ratio of edited allele reads count/total reads

534 count served as editing frequency for each site and the significance of editing frequency  
535 difference between NIL-SK and NIL-ZHENG58 was estimated by pairwise *t*-test with a  
536 threshold *P*-value < 0.05. Only the loci with a mean editing frequency difference over 5%  
537 between NIL-SK and NIL-ZHENG58 were treated as possibly RNA editing sites being  
538 affected by *qKW9*.

### 539 **RNA extraction and qRT-PCR**

540 Total RNA was extracted from various plant tissues except leaf using RNA extraction kit  
541 (Cat no: 0416-50, Huayueyang, China). cDNA was synthesized from the extracted RNA using  
542 the TransScript One-Step gDNA Removal and cDNA Synthesis SuperMix (Cat no: AT311,  
543 TransGen Biotech, China). qRT-PCR was carried out in a total volume of 20  $\mu$ l containing 2  $\mu$ l  
544 of 10x-diluted reverse-transcribed product, 0.2 mM gene-specific primers, and 10  $\mu$ l KAPA  
545 SYBR® FAST qPCR Master Mix (Cat no: KK4607), using a Bio-Rad CFX96 Touch™  
546 Real-time PCR detection system according to the manufacturer's instructions. Quantitative  
547 PCR was performed for the gene expression using QPIG, QPPR, and ACTIN primers (Table  
548 S1).

### 549 **Immunoblot Analysis**

550 Chloroplast membrane proteins were isolated from the leaves of around 2-week-old  
551 maize plants using kits (Cat no: BB-3175, BestBio, China). Protein samples were quantified  
552 with BCA protein assay. The protein samples were separated by 12% SDS-PAGE. After  
553 electrophoresis, the proteins were transferred onto a PVDF membrane (0.2  $\mu$ m, Bio-Rad)  
554 using Bio-Rad Semi-Dry Transfer Cell. The blot was blocked with 5% milk in TBST for 1h at  
555 room temperature (RT) with agitation and then incubated in the primary antibody (from  
556 Agrisera, AS16 4065) at a dilution of 1: 500 overnight in +4°C. The antibody solution was  
557 decanted, and the blot was washed briefly with TBST at RT with agitation. The blot was  
558 incubated in secondary antibody (anti-rabbit IgG horseradish peroxidase conjugated, from  
559 Agrisera, AS09 602) diluted to 1:10 000 in 1% milk/TBST for 30min at RT with agitation.  
560 The blot was washed briefly in TBST at RT with agitation and developed for 2 min with ECL  
561 according to the manufacturer's instructions (Cat no: SL1350, Coolaber, China). The signals

562 were visualized by a GeneGnome chemiluminescence analyzer (Syngene).

### 563 **ASSESSION NUMBERS**

564 Sequence data from this article can be found in the GenBank/NCBI databases under the  
565 SRA accession number: PRJNA588870.

### 566 **SUPPLEMENTARY DATA**

567 **Supplemental Figure S1** Schematic representation of genotypes and kernel weights of  
568 recombinant families derived from F1H5.

569 **Supplemental Figure S2** qPCR analysis of Zm00001d048450 and Zm00001d048451  
570 expression.

571 **Table S1** Primer sequences used in this study.

### 572 **ACKNOWLEDGEMENTS**

573 This work was supported by the National Key Research and Development Program of China  
574 (2016YFD0100303), the National Natural Science Foundation of China (31525017,  
575 31961133002), and NSF grant IOS-1546837 to DJ; Juan Huang was sponsored by China  
576 Scholarship Council to visit Cold Spring Harbor Laboratory and study in Prof. David Jackson's  
577 lab from March 2018 to March 2019 (File No. 201706760027). We thank Dr. Yali Zhang from  
578 Shihezi University for suggestions on measurements of chlorophyll fluorescence. We thank Dr.  
579 Edgar Demesa Arevalo's help in taking confocal images and for providing for P19 containing  
580 strain. We thank Dr. Hannes Claeys for providing pK7FWG2.0 containing strain. We thank  
581 Felix Fritschi for use of the chlorophyll fluorescence meter.

### 582 **FIGURE LEGENDS**

583 **Figure 1. Plant and kernel morphology of NIL-SK and NIL-Zheng58.** (A) NIL-SK (NS)  
584 and NIL-Zheng58 (NZ) had very similar plant architecture, Bar=20cm. (B) NIL-SK (NS)  
585 two-week old seedlings were smaller than NIL-Zheng58 (NZ). Bar=4cm. (C) Leaf senescence  
586 was greater in NIL-SK (NS) at 30 days after pollination compared to NIL-Zheng58. Bar=10cm.  
587 (D) Ears of NIL-SK (NS) were smaller than in NIL-Zheng58 (NZ). Bar=1cm. (E) to (J)

588 Mature kernels of NIL-SK (E-G) were smaller than in NIL-Zheng58 (H-J). Whole kernels of  
589 NIL-SK and NIL-Zheng58 ([E] and [H]). Bar=2mm; transverse section of kernel of NIL-SK  
590 and NIL-Zheng58([F] and [I]). Bar=2mm; Longitudinal section of kernel of NIL-SK and  
591 NIL-Zheng58([G] and [J]). Bar=2mm; (K) to (R) Similar starch structure in endosperms of  
592 mature kernels of NIL-SK and NIL-Zheng58. Whole longitudinal section stained with iodine  
593 solution of kernels of NIL-SK and NIL-Zheng58 ([K] and [O]), 1, 2, 3 indicate the crown,  
594 farinaceous and keratin endosperm regions, respectively. Bar=1mm; (L) to (N) correspond to  
595 regions 1, 2, 3 in (K); and (P) to (R) correspond to regions 1, 2, 3 in (O). Bar=10µm.

596

597 **Figure 2. Fine mapping and gene structure of *qKW9*.** (A) Mapping delimits *qKW9* to the  
598 region between M3484 and M3506 on chromosome 9. F1H5 which derives from ZHENG58 ×  
599 SK RIL population is the founder line for screening heterozygous inbred families (HIFs) for  
600 fine mapping *qKW9*. Progeny tests of kernel weight were conducted on the resulting  
601 recombinant families. White bar represents the homozygous chromosomal segment for SK,  
602 grey bar represents the heterozygous chromosomal segment for ZHENG58 × SK, black bar  
603 represents the homozygous chromosomal segment for ZHENG58. The graphical genotype  
604 represents F1H5. Numbers between markers represent physical distances (Kb) between the  
605 adjacent markers and numbers in brackets represent the number of recombinants. (B) Gene  
606 annotations in the region of *qKW9* of B73, SK, and Zheng58. Sequences were obtained by  
607 sequencing BACs covering *qKW9* from SK and ZHENG58 genome BAC libraries,  
608 respectively. Zm00001d048452 was absent in both SK and ZHENG58. Two candidate  
609 genes-Zm00001d048450 and Zm00001d048451- were identified in *qKW9*. (C)  
610 Zm00001d048451 is a 1.8kb intron-less gene with 8 pentatricopeptide repeats and a  
611 13bp-deletion was identified in coding region of Zm00001d048451 in SK. CRISPR/Cas9 was  
612 used to create knockout mutants with a single guide sequence (the 20bp sequence adjacent to  
613 PAM) targeting Zm00001d048451 in the inbred C01. Two mutated alleles - *qkw9-cr1* and  
614 *qkw9-cr2* - were identified by sequencing the first-generation (T<sub>0</sub>) plants and used for further  
615 genetic analysis.

616

617 **Figure 3. Two CRISPR/Cas9 knockout mutants of *Zm00001d048451-qkw9-cr1* and**  
618 ***qkw9-cr2*-produced smaller ears and smaller kernels than wild type.** Each mutant is shown  
619 alongside its corresponding wild type segregant from a single Cas9-free T<sub>1</sub> generation plant. (A)  
620 and (B) comparison of ears produced by CRISPR/Cas9 mutants (left) and WT (right).  
621 *qkw9-cr1* (left) and wild type (right) in (A) and *qkw9-cr2* (left) and wild type (right) in (B).  
622 Bar=1cm. (D) and (E) kernels produced by CRISPR/Cas9 mutants (lower row) were smaller  
623 than WT (upper row). *qkw9-cr1* (lower) and wild type (upper) in (D) and *qkw9-cr2* (lower)  
624 and wild type (upper) in (E). Bar=1cm. (C) and (F) show reductions in ear weight (C) and  
625 kernel weight (F) of CRISPR/Cas9 knockout mutants. Data are shown as mean  $\pm$  SD (n=6).  
626 \*\*\* P < 0.001.

627

628 **Figure 4. Characterization of *qKW9/Zm00001d048451*.** (A) Phylogenetic tree of maize,  
629 Arabidopsis and rice PLS-E, PLE-E+, and PLS-DYW Pentatricopeptide Repeat genes  
630 predicted to localize in chloroplast/plastid by TargetP. (B) Autofluorescence of chlorophyll  
631 (red). (C) qKW9-GFP fusion protein (green) in green puncta within plastids (D) DAPI  
632 staining (blue) of nuclei (E) Overlay of (B), (C) and (D). Scale bar=5  $\mu$ m. (F) Allele in  
633 NIL-SK of *Zm00001d048451* fails to edit C to U in 246<sup>th</sup> codon of *NdhB* gene. C-to-U editing  
634 in *NdhB*-246 results in amino acid change from proline to leucine. Pro, proline; Leu, leucine.  
635

636 **Figure 5. Protein blot analysis of the NDH complex.** Chloroplast membrane protein was  
637 extracted with a commercial kit and protein samples were quantified with BCA protein assay.  
638 1 $\times$  sample amount equals 40  $\mu$ g protein. Antibody against NdhH was used to indicate the  
639 amount of NDH complex. Chloroplast membrane protein from NIL-ZHENG58 was loaded a  
640 series of dilutions as indicated. Specific bands corresponded in size of NdhH protein  
641 (expected in 45 kDa, apparent in 49 kDa). Signals in NIL-ZHENG58 declined along with the  
642 dilution. The level of NdhH in NIL-SK was reduced to less than 25% of NIL-ZHENG58.  
643 Coomassie R-250 staining was used to show the proteins separated by electrophoresis as a



644 loading control.

645

646 **Figure 6. NDH activity monitoring and NPQ and ETR in null mutants of qKW9. (A)**

647 Monitoring of NDH activity using chlorophyll fluorescence analysis for *qkw9-cr1* and  
648 *qkw9-cr2* mutants. The curve shows the typical change trace of chlorophyll fluorescence *in*  
649 *vivo* as the NDH complex catalyzes the post-illumination reduction of the plastoquinone pool  
650 (Okuda et al., 2007). The change in post-illumination fluorescence ascribed to NDH activity  
651 was different between WT and mutants. Insets are magnified traces from the boxed area. ML,  
652 measuring light; AL, actinic light; SP, a saturating pulse of white light. **(B)** NPQ was induced  
653 by light intensity in both *cr1* and WT, but it was significantly lower in *cr1* under photon flux  
654 density of 2413  $\mu\text{mol}$  of photons  $\text{m}^{-2}\text{s}^{-1}$ . **(C)** relative ETR (rETR) under different photon flux  
655 densities. rETR in *cr1* and WT reached maximum when the light intensity was 422  $\mu\text{mol}$  of  
656 photons  $\text{m}^{-2}\text{s}^{-1}$ . It was significantly lower in *cr1* under the photon flux density of 206  $\mu\text{mol}$  of  
657 photons  $\text{m}^{-2}\text{s}^{-1}$  and 2413  $\mu\text{mol}$  of photons  $\text{m}^{-2}\text{s}^{-1}$ . The rETR is depicted relative to a maximal  
658 value of  $\Phi_{\text{PSII}} \times \text{PPFD}$  (photon flux density,  $\mu\text{mol}$  of photons  $\text{m}^{-2}\text{s}^{-1}$ ). Data are shown as mean  $\pm$   
659 SD ( $n=6$ ).

660

661 **Figure 7. Grain filling and photosynthesis measurement in NIL-SK and NIL-Zheng58.**

662 **(A)** Time courses of fresh weight of 50 kernels of NIL-SK and NIL-Zheng58. The fresh weight  
663 of NIL-SK and NIL-ZHENGN58 reached the maximum at 30 DAP and 35 DAP, respectively. **(B)**  
664 to **(E)** Time courses of photosynthesis-rate related parameters of NIL-SK and NIL-Zheng58.  
665 Net photosynthesis **(B)**, stomatal conductance **(C)**, and transpiration rate **(D)** were significantly  
666 lower in NIL-SK than NIL-ZHENG58 at 22 DAP and 30 DAP; **(E)** chlorophyll content and **(F)**  
667 maximum photochemical efficiency did not show significant between genotype differences at  
668 any of the four stages tested. Data are shown as mean  $\pm$  SD ( $n=6$ ).

669

670

671 **Table 1.** Ear related and agronomic traits in NIL-SK and NIL-Zheng58.

| Trait                   | NIL-SK                     |                | NIL-Zheng58        |    | P-value                         |
|-------------------------|----------------------------|----------------|--------------------|----|---------------------------------|
|                         | Mean $\pm$ SD <sup>a</sup> | N <sup>b</sup> | Mean $\pm$ SD      | N  |                                 |
| Hundred Kernel Weight/g | 15.59 $\pm$ 2.01           | 27             | 18.57 $\pm$ 1.21   | 30 | 6.07 $\times$ 10 <sup>-9</sup>  |
| Ear Length/cm           | 9.75 $\pm$ 0.75            | 31             | 10.68 $\pm$ 0.76   | 37 | 3.72 $\times$ 10 <sup>-6</sup>  |
| Kernel Number per Row   | 22.00 $\pm$ 2.99           | 27             | 24.03 $\pm$ 2.28   | 32 | 4.47 $\times$ 10 <sup>-3</sup>  |
| Ear Row Number          | 12.43 $\pm$ 1.00           | 28             | 12.39 $\pm$ 0.80   | 36 | 0.86                            |
| Kernel Number per Ear   | 249.22 $\pm$ 39.45         | 27             | 279.39 $\pm$ 34.28 | 31 | 2.89 $\times$ 10 <sup>-3</sup>  |
| Ear Weight/g            | 43.79 $\pm$ 7.60           | 30             | 57.33 $\pm$ 8.35   | 36 | 3.74 $\times$ 10 <sup>-9</sup>  |
| Kernel Weight per Ear/g | 38.84 $\pm$ 6.60           | 19             | 53.68 $\pm$ 7.44   | 17 | 3.07 $\times$ 10 <sup>-7</sup>  |
| Plant Height/cm         | 190.73 $\pm$ 10.52         | 92             | 195.29 $\pm$ 10.12 | 91 | 3.22 $\times$ 10 <sup>-3</sup>  |
| Ear Height/cm           | 84.48 $\pm$ 7.19           | 92             | 83.65 $\pm$ 9.68   | 91 | 0.51                            |
| Days to Shedding/Day    | 63.38 $\pm$ 1.81           | 68             | 60.16 $\pm$ 1.21   | 70 | 6.72 $\times$ 10 <sup>-24</sup> |

672 <sup>a</sup> SD=standard deviation; <sup>b</sup>N, number of observed individuals.

673



675 **Table 2** C-to-U editing sites in plastid genes with significant editing frequency difference  
 676 between NIL-SK and NIL-Zheng58.

| Locus(transcript)    | Genome position | Feature         | Developing Stages   | Editing level% |             | P-value  | Editing difference % |
|----------------------|-----------------|-----------------|---------------------|----------------|-------------|----------|----------------------|
|                      |                 |                 |                     | NIL-SK         | NIL-Zheng58 |          |                      |
| GRMZM5G876106(NdhB)  | 90736           | CDS, P>L        | Before              | 0.00           | 100.00      | NA       | 100.00               |
|                      |                 |                 | Pollination         |                |             |          |                      |
|                      |                 |                 | 22 DAP <sup>a</sup> | 0.00           | 100.00      |          |                      |
|                      |                 |                 | 30 DAP              | 0.00           | 100.00      |          |                      |
|                      |                 |                 | Before              | 0.00           | 97.05       | 2.00E-05 | 98.15                |
|                      |                 |                 | Pollination         |                |             |          |                      |
| 22 DAP               | 0.00            | 98.79           |                     |                |             |          |                      |
|                      | 132001          | CDS, P>L        | 30 DAP              | 0.00           | 98.60       |          |                      |
|                      |                 |                 | Before              | 0.00           | 72.73       | 0.0041   | 87.21                |
|                      |                 |                 | Pollination         |                |             |          |                      |
| 22 DAP               | 0.00            | 88.89           |                     |                |             |          |                      |
| intergenic           | 65407           |                 | 30 DAP              | 0.00           | 100.00      |          |                      |
|                      |                 |                 | Before              | 26.64          | 36.36       | 0.024    | 8.96                 |
|                      |                 |                 | Pollination         |                |             |          |                      |
| 22 DAP               | 18.52           | 30.60           |                     |                |             |          |                      |
| GRMZM5G866064        | 139970          | CDS, synonymous | 30 DAP              | 27.87          | 32.95       |          |                      |
|                      |                 |                 | Before              | 9.40           | 16.77       | 0.044    | 5.82                 |
|                      |                 |                 | Pollination         |                |             |          |                      |
| 22 DAP               | 31.63           | 39.61           |                     |                |             |          |                      |
| GRMZM5G856777        | 8558            | 5'UTR           | 30 DAP              | 35.50          | 37.63       |          |                      |
|                      |                 |                 | Before              | 89.36          | 96.92       | 0.048    | 5.79                 |
|                      |                 |                 | Pollination         |                |             |          |                      |
| 22 DAP               | 98.08           | 100.00          |                     |                |             |          |                      |
| GRMZM5G845244 (rps8) | 78717           | CDS, S>L        | 30 DAP              | 92.11          | 100.00      |          |                      |

677 <sup>a</sup> DAP= days after pollination.

678

679

680



## Parsed Citations

**Alric J, Johnson X (2017) Alternative electron transport pathways in photosynthesis: a confluence of regulation. *Curr Opin Plant Biol* 37: 78–86**

Pubmed: [Author and Title](#)

Google Scholar: [Author Only](#) [Title Only](#) [Author and Title](#)

**Andrews S (2010) FastQC: a quality control tool for high throughput sequence data.**

**Barkan A, Small I (2014) Pentatricopeptide Repeat Proteins in Plants. *Annu Rev Plant Biol* 65: 415–442**

Pubmed: [Author and Title](#)

Google Scholar: [Author Only](#) [Title Only](#) [Author and Title](#)

**Bihmidine S, Hunter CT, Johns CE, Koch KE, Braun DM (2013) Regulation of assimilate import into sink organs: Update on molecular drivers of sink strength. *Front Plant Sci*. doi: 10.3389/fpls.2013.00177**

Pubmed: [Author and Title](#)

Google Scholar: [Author Only](#) [Title Only](#) [Author and Title](#)

**Bolger AM, Lohse M, Usadel B (2014) Trimmomatic: A flexible trimmer for Illumina sequence data. *Bioinformatics* 30: 2114–2120**

Pubmed: [Author and Title](#)

Google Scholar: [Author Only](#) [Title Only](#) [Author and Title](#)

**Burrows PA, Sazanov LA, Svab Z, Maliga P, Nixon PJ (1998) Identification of a functional respiratory complex in chloroplasts through analysis of tobacco mutants containing disrupted plastid *ndh* genes. *EMBO J* 17: 868–876**

Pubmed: [Author and Title](#)

Google Scholar: [Author Only](#) [Title Only](#) [Author and Title](#)

**Cai M, Li S, Sun F, Sun Q, Zhao H, Ren X, Zhao Y, Tan BC, Zhang Z, Qiu F (2017) Emp10 encodes a mitochondrial PPR protein that affects the cis-splicing of *nad2* intron 1 and seed development in maize. *Plant J* 91: 132–144**

Pubmed: [Author and Title](#)

Google Scholar: [Author Only](#) [Title Only](#) [Author and Title](#)

**Chateigner-Boutin AL, Small I (2010) Plant RNA editing. *RNA Biol* 7: 213–219**

Pubmed: [Author and Title](#)

Google Scholar: [Author Only](#) [Title Only](#) [Author and Title](#)

**Chen X, Feng F, Qi W, Xu L, Yao D, Wang Q, Song R (2017) Dek35 Encodes a PPR Protein that Affects cis-Splicing of Mitochondrial *nad4* Intron 1 and Seed Development in Maize. *Mol Plant* 10: 427–441**

Pubmed: [Author and Title](#)

Google Scholar: [Author Only](#) [Title Only](#) [Author and Title](#)

**Clark JK, Sheridan F (1991) Isolation and Characterization of 51 embryo-specific Mutations of Maize. *Plant Cell* 3: 935–951**

Pubmed: [Author and Title](#)

Google Scholar: [Author Only](#) [Title Only](#) [Author and Title](#)

**Dai D, Luan S, Chen X, Wang Q, Feng Y, Zhu C, Qi W, Song R (2018) Maize Dek37 encodes a P-type PPR protein that affects cis-splicing of mitochondrial *nad2* intron 1 and seed development. *Genetics* 208: 1069–1082**

Pubmed: [Author and Title](#)

Google Scholar: [Author Only](#) [Title Only](#) [Author and Title](#)

**DalCorso G, Pesaresi P, Masiero S, Aseeva E, Schünemann D, Finazzi G, Joliot P, Barbato R, Leister D (2008) A Complex Containing PGR1 and PGR5 Is Involved in the Switch between Linear and Cyclic Electron Flow in Arabidopsis. *Cell* 132: 273–285**

Pubmed: [Author and Title](#)

Google Scholar: [Author Only](#) [Title Only](#) [Author and Title](#)

**Emanuelsson O, Brunak S, von Heijne G, Nielsen H (2007) Locating proteins in the cell using TargetP, SignalP and related tools. *Nat Protoc* 2: 953–971**

Pubmed: [Author and Title](#)

Google Scholar: [Author Only](#) [Title Only](#) [Author and Title](#)

**Felsenstein J (1985) Confidence Limits on Phylogenies: An Approach Using the Bootstrap. *Evolution* (N Y) 39: 783**

Pubmed: [Author and Title](#)

Google Scholar: [Author Only](#) [Title Only](#) [Author and Title](#)

**Finn RD, Clements J, Eddy SR (2011) HMMER web server: Interactive sequence similarity searching. *Nucleic Acids Res*. doi: 10.1093/nar/gkr367**

Pubmed: [Author and Title](#)

Google Scholar: [Author Only](#) [Title Only](#) [Author and Title](#)

**Hammani K, Okuda K, Tanz SK, Chateigner-Boutin A-L, Shikanai T, Small I (2009) A Study of New Arabidopsis Chloroplast RNA Editing Mutants Reveals General Features of Editing Factors and Their Target Sites. *Plant Cell* 21: 3686–3699**

Pubmed: [Author and Title](#)

Google Scholar: [Author Only](#) [Title Only](#) [Author and Title](#)



Hashimoto M, Endo T, Peltier G, Tasaka M, Shikanai T, Wise RP, Pring DR (2003) A nucleus-encoded factor, CRR2, is essential for the expression of chloroplast ndhB in Arabidopsis. *Plant J* 36: 541–549

Pubmed: [Author and Title](#)

Google Scholar: [Author Only Title Only Author and Title](#)

Horváth EM, Peter SO, Joët T, Rumeau D, Cournac L, Horváth G V., Kavanagh TA, Schäfer C, Peltier G, Medgyesy P (2000) Targeted inactivation of the Plastid ndhB Gene in Tobacco Results in an Enhanced Sensitivity of Photosynthesis to Moderate Stomatal Closure. *Plant Physiol* 123: 1337–1350

Pubmed: [Author and Title](#)

Google Scholar: [Author Only Title Only Author and Title](#)

Huang M, Slewinski TL, Baker RF, Janick-Buckner D, Buckner B, Johal GS, Braun DM (2009) Camouflage patterning in maize leaves results from a defect in porphobilinogen deaminase. *Mol Plant* 2: 773–789

Pubmed: [Author and Title](#)

Google Scholar: [Author Only Title Only Author and Title](#)

Ishikawa N, Takabayashi A, Noguchi K, Tazoe Y, Yamamoto H, Von Caemmerer S, Sato F, Endo T (2016a) NDH-mediated cyclic electron flow around photosystem I is crucial for C4 photosynthesis. *Plant Cell Physiol* 57: 2020–2028

Pubmed: [Author and Title](#)

Google Scholar: [Author Only Title Only Author and Title](#)

Ishikawa N, Takabayashi A, Sato F, Endo T (2016b) Accumulation of the components of cyclic electron flow around photosystem I in C4 plants, with respect to the requirements for ATP. *Photosynth Res* 129: 261–277

Pubmed: [Author and Title](#)

Google Scholar: [Author Only Title Only Author and Title](#)

Karcher D, Bock R (2002) The amino acid sequence of a plastid protein is developmentally regulated by RNA editing. *J Biol Chem* 277: 5570–5574

Pubmed: [Author and Title](#)

Google Scholar: [Author Only Title Only Author and Title](#)

Kim D, Langmead B, Salzberg SL (2015) HISAT: A fast spliced aligner with low memory requirements. *Nat Methods* 12: 357–360

Pubmed: [Author and Title](#)

Google Scholar: [Author Only Title Only Author and Title](#)

Kotera E, Tasaka M, Shikanai T (2005) A pentatricopeptide repeat protein is essential for RNA editing in chloroplasts. *Nature* 433: 326–330

Pubmed: [Author and Title](#)

Google Scholar: [Author Only Title Only Author and Title](#)

Kumar S, Stecher G, Li M, Knyaz C, Tamura K (2018) MEGAX: Molecular evolutionary genetics analysis across computing platforms. *Mol Biol Evol* 35: 1547–1549

Pubmed: [Author and Title](#)

Google Scholar: [Author Only Title Only Author and Title](#)

Laughlin TG, Bayne AN, Trempe J-F, Savage DF, Davies KM (2019) Structure of the complex I-like molecule NDH of oxygenic photosynthesis. *Nature* 566: 411–414

Pubmed: [Author and Title](#)

Google Scholar: [Author Only Title Only Author and Title](#)

Li Q, Li L, Yang X, Warburton ML, Bai G, Dai J, Li J, Yan J (2010a) Relationship, evolutionary fate and function of two maize co-orthologs of rice GW2 associated with kernel size and weight. *BMC Plant Biol* 10: 143

Pubmed: [Author and Title](#)

Google Scholar: [Author Only Title Only Author and Title](#)

Li Q, Yang X, Bai G, Warburton ML, Mahuku G, Gore M, Dai J, Li J, Yan J (2010b) Cloning and characterization of a putative GS3 ortholog involved in maize kernel development. *Theor Appl Genet* 120: 753–763

Pubmed: [Author and Title](#)

Google Scholar: [Author Only Title Only Author and Title](#)

Li X, Gu W, Sun S, Chen Z, Chen J, Song W, Zhao H, Lai J (2018) Defective Kernel 39 encodes a PPR protein required for seed development in maize. *J Integr Plant Biol* 60: 45–64

Pubmed: [Author and Title](#)

Google Scholar: [Author Only Title Only Author and Title](#)

Li XJ, Zhang YF, Hou M, Sun F, Shen Y, Xiu ZH, Wang X, Chen ZL, Sun SSM, Small I, et al (2014) Small kernel 1 encodes a pentatricopeptide repeat protein required for mitochondrial nad7 transcript editing and seed development in maize (*Zea mays*) and rice (*Oryza sativa*). *Plant J* 79: 797–809

Pubmed: [Author and Title](#)

Google Scholar: [Author Only Title Only Author and Title](#)

Lindbo JA (2007) High-efficiency protein expression in plants from agroinfection-compatible Tobacco mosaic virus expression vectors. *BMC Biotechnol* 7: 1–11

Pubmed: [Author and Title](#)

Google Scholar: [Author Only Title Only Author and Title](#)

**Liu H, Ding Y, Zhou Y, Jin W, Xie K, Chen LL (2017a) CRISPR-P 2.0: An Improved CRISPR-Cas9 Tool for Genome Editing in Plants. Mol Plant 10: 530–532**

Pubmed: [Author and Title](#)

Google Scholar: [Author Only Title Only Author and Title](#)

**Liu J, Deng M, Guo H, Raihan S, Luo J, Xu Y, Dong X, Yan J (2015) Maize orthologs of rice GS5 and their trans-regulator are associated with kernel development. J Integr Plant Biol 57: 943–953**

Pubmed: [Author and Title](#)

Google Scholar: [Author Only Title Only Author and Title](#)

**Liu J, Huang J, Guo H, Lan L, Wang H, Xu Y, Yang X, Li W, Tong H, Xiao Y, et al (2017b) The conserved and unique genetic architecture of kernel size and weight in maize and rice. Plant Physiol 175: 774–785**

Pubmed: [Author and Title](#)

Google Scholar: [Author Only Title Only Author and Title](#)

**Liu N, Liu J, Li W, Pan Q, Liu J, Yang X, Yan J, Xiao Y (2018) Intraspecific variation of residual heterozygosity and its utility for quantitative genetic studies in maize. BMC Plant Biol 18: 66**

Pubmed: [Author and Title](#)

Google Scholar: [Author Only Title Only Author and Title](#)

**Lurin C, Andres C, Aubourg S, Bellaoui M, Bitton F, Bruyere C, Caboche M, Debast C, Gualberto J, Hoffmann H, et al (2004) Genome-wide Analysis of Arabidopsis Pentatricopeptide Repeat Proteins Reveals Their Essential Role in Organelle Biogenesis. Plant Cell 16: 2089–2103**

Pubmed: [Author and Title](#)

Google Scholar: [Author Only Title Only Author and Title](#)

**Maier RM, Neckermann K, Igloi GL, Koössel H (1995) Complete sequence of the maize chloroplast genome: Gene content, hotspots of divergence and fine tuning of genetic information by transcript editing. J Mol Biol 251: 614–628**

Pubmed: [Author and Title](#)

Google Scholar: [Author Only Title Only Author and Title](#)

**Manavski N, Guyon V, Meurer J, Wienand U, Brettschneider R (2012) An Essential Pentatricopeptide Repeat Protein Facilitates 5' Maturation and Translation Initiation of rps3 mRNA in Maize Mitochondria. Plant Cell 24: 3087–3105**

Pubmed: [Author and Title](#)

Google Scholar: [Author Only Title Only Author and Title](#)

**McCarty DR (2017) Maize kernel development. In B Larkins, ed, Maize kernel Dev. CABI, pp 44–55**

Pubmed: [Author and Title](#)

Google Scholar: [Author Only Title Only Author and Title](#)

**McKenna A, Hanna M, Banks E, Sivachenko A, Cibulskis K, Kernytisky A, Garimella K, Altshuler D, Gabriel S, Daly M, et al (2010) The genome analysis toolkit: A MapReduce framework for analyzing next-generation DNA sequencing data. Genome Res 20: 1297–1303**

Pubmed: [Author and Title](#)

Google Scholar: [Author Only Title Only Author and Title](#)

**Munekage Y, Hashimoto M, Miyake C, Tomizawa KI, Endo T, Tasaka M, Shikanai T (2004) Cyclic electron flow around photosystem I is essential for photosynthesis. Nature 429: 579–582**

Pubmed: [Author and Title](#)

Google Scholar: [Author Only Title Only Author and Title](#)

**Munekage Y, Hojo M, Meurer J, Endo T, Tasaka M, Shikanai T (2002) PGR5 is involved in cyclic electron flow around photosystem I and is essential for photoprotection in Arabidopsis. Cell 110: 361–371**

Pubmed: [Author and Title](#)

Google Scholar: [Author Only Title Only Author and Title](#)

**Munekage YN, Taniguchi YY (2016) Promotion of Cyclic Electron Transport Around Photosystem I with the Development of C4 Photosynthesis. Plant Cell Physiol 57: 897–903**

Pubmed: [Author and Title](#)

Google Scholar: [Author Only Title Only Author and Title](#)

**Nakamura N, Iwano M, Havaux M, Yokota A, Munekage YN (2013) Promotion of cyclic electron transport around photosystem I during the evolution of NADP-malic enzyme-type C4 photosynthesis in the genus Flaveria. New Phytol 199: 832–842**

Pubmed: [Author and Title](#)

Google Scholar: [Author Only Title Only Author and Title](#)

**Nakano H, Yamamoto H, Shikanai T (2019) contribution of NDH-dependent cyclic electron transport around photosyst. BBA-Bioenergetics 1860: 369–374**

Pubmed: [Author and Title](#)

Google Scholar: [Author Only Title Only Author and Title](#)

**Nashilevitz S, Melamed-Bessudo C, Izkovich Y, Rogachev I, Osorio S, Itkin M, Adato A, Pankratov I, Hirschberg J, Fernie AR, et al (2010) An orange ripening mutant links plastid NAD(P)H dehydrogenase complex activity to central and specialized metabolism during tomato fruit maturation. Plant Cell 22: 1977–1997**

Pubmed: [Author and Title](#)

Google Scholar: [Author Only Title Only Author and Title](#)

**Neuffer MG, Sheridan WF (1980) DEFECTIVE KERNEL MUTANTS OF MAIZE . I . GENETIC AND LETHALITY STUDIES. Genetics 95: 929–944**

Pubmed: [Author and Title](#)

Google Scholar: [Author Only Title Only Author and Title](#)

**Okuda K, Chateigner-Boutin A-L, Nakamura T, Delannoy E, Sugita M, Myouga F, Motohashi R, Shinozaki K, Small I, Shikanai T (2009) Pentatricopeptide Repeat Proteins with the DYW Motif Have Distinct Molecular Functions in RNA Editing and RNA Cleavage in Arabidopsis Chloroplasts . Plant Cell 21: 146–156**

Pubmed: [Author and Title](#)

Google Scholar: [Author Only Title Only Author and Title](#)

**Okuda K, Hammani K, Tanz SK, Peng L, Fukao Y, Myouga F, Motohashi R, Shinozaki K, Small I, Shikanai T (2010) The pentatricopeptide repeat protein OTP82 is required for RNA editing of plastid ndhB and ndhG transcripts. Plant J 61: 339–349**

Pubmed: [Author and Title](#)

Google Scholar: [Author Only Title Only Author and Title](#)

**Okuda K, Myouga F, Motohashi R, Shinozaki K, Shikanai T (2007) Conserved domain structure of pentatricopeptide repeat proteins involved in chloroplast RNA editing. Proc Natl Acad Sci 104: 8178–8183**

Pubmed: [Author and Title](#)

Google Scholar: [Author Only Title Only Author and Title](#)

**Peeters NM, Hanson MR (2002) Transcript abundance supercedes editing efficiency as a factor in developmental variation of chloroplast gene expression. RNA 8: 497–511**

Pubmed: [Author and Title](#)

Google Scholar: [Author Only Title Only Author and Title](#)

**Peltier G, Aro E, Shikanai T (2016) NDH-1 and NDH-2 Plastoquinone Reductases in Oxygenic Photosynthesis. Annu Rev Plant Biol 67: 55–80**

Pubmed: [Author and Title](#)

Google Scholar: [Author Only Title Only Author and Title](#)

**Qi W, Tian Z, Lu L, Chen X, Chen X, Zhang W, Song R (2017) Editing of mitochondrial transcripts nad3 and cox2 by dek10 is essential for mitochondrial function and maize plant development. Genetics 205: 1489–1501**

Pubmed: [Author and Title](#)

Google Scholar: [Author Only Title Only Author and Title](#)

**Raihan MS, Liu J, Huang J, Guo H, Pan Q, Yan J (2016) Multi-environment QTL analysis of grain morphology traits and fine mapping of a kernel-width QTL in Zheng58 × SK maize population. Theor Appl Genet 129: 1465–1477**

Pubmed: [Author and Title](#)

Google Scholar: [Author Only Title Only Author and Title](#)

**Ren X, Pan Z, Zhao H, Zhao J, Cai M, Li J, Zhang Z, Qiu F, Leubner G (2017) EMPTY PERICARP11 serves as a factor for splicing of mitochondrial nad1 intron and is required to ensure proper seed development in maize. J Exp Bot 68: 4571–4581**

Pubmed: [Author and Title](#)

Google Scholar: [Author Only Title Only Author and Title](#)

**Rumeau D, Peltier G, Cournac L (2007) Chlororespiration and cyclic electron flow around PSI during photosynthesis and plant stress response. Plant, Cell Environ 30: 1041–1051**

Pubmed: [Author and Title](#)

Google Scholar: [Author Only Title Only Author and Title](#)

**Ruwe H, Castandet B, Schmitz-Linneweber C, Stern DB (2013) Arabidopsis chloroplast quantitative editotype. FEBS Lett 587: 1429–1433**

Pubmed: [Author and Title](#)

Google Scholar: [Author Only Title Only Author and Title](#)

**Ruwe H, Gutmann B, Schmitz-Linneweber C, Small I, Kindgren P (2019) The E domain of CRR2 participates in sequence-specific recognition of RNA in plastids. New Phytol 222: 218–229**

Pubmed: [Author and Title](#)

Google Scholar: [Author Only Title Only Author and Title](#)

**Saitou N, Nei M (1987) The neighbor-joining method: a new method for reconstructing phylogenetic trees. Mol Biol Evol 4: 406–425**

Pubmed: [Author and Title](#)

Google Scholar: [Author Only Title Only Author and Title](#)

**Scanlon MJ, Takacs EM (2009) Kernel biology. In J Bennetzen, S Hake, eds, Handb. Maize Its Biol. Springer, New York, NY, pp 121–143**

Pubmed: [Author and Title](#)

Google Scholar: [Author Only Title Only Author and Title](#)

**Schmitz-Linneweber C, Small I (2008) Pentatricopeptide repeat proteins: a socket set for organelle gene expression. Trends Plant Sci 13: 663–670**

Pubmed: [Author and Title](#)

Google Scholar: [Author Only](#) [Title Only](#) [Author and Title](#)

**Sheridan WF, Neuffer MG (1980) Defective kernel mutants of maize II. morphological and embryo culture studies. Genetics 95: 945–960**

Pubmed: [Author and Title](#)

Google Scholar: [Author Only](#) [Title Only](#) [Author and Title](#)

**Shikanai T (2007) Cyclic Electron Transport Around Photosystem I: Genetic Approaches. Annu Rev Plant Biol 58: 199–217**

Pubmed: [Author and Title](#)

Google Scholar: [Author Only](#) [Title Only](#) [Author and Title](#)

**Shikanai T, Endo T, Hashimoto T, Yamada Y, Asada K, Yokota A (1998) Directed disruption of the tobacco ndhB gene impairs cyclic electron flow around photosystem I. Proc Natl Acad Sci 95: 9705–9709**

Pubmed: [Author and Title](#)

Google Scholar: [Author Only](#) [Title Only](#) [Author and Title](#)

**Sonnwald U, Fernie AR (2018) Next-generation strategies for understanding and influencing source–sink relations in crop plants. Curr Opin Plant Biol 43: 63–70**

Pubmed: [Author and Title](#)

Google Scholar: [Author Only](#) [Title Only](#) [Author and Title](#)

**Sosso D, Luo D, Li Q-B, Sasse J, Yang J, Gendrot G, Suzuki M, Koch KE, McCarty DR, Chourey PS, et al (2015) Seed filling in domesticated maize and rice depends on SWEET-mediated hexose transport. Nat Genet 47: 1489–1493**

Pubmed: [Author and Title](#)

Google Scholar: [Author Only](#) [Title Only](#) [Author and Title](#)

**Sosso D, Mbello S, Vernoud V, Gendrot G, Dedieu A, Chambrier P, Dauzat M, Heurtevin L, Guyon V, Takenaka M, et al (2012) PPR2263, a DYW-Subgroup Pentatricopeptide Repeat Protein, Is Required for Mitochondrial nad5 and cob Transcript Editing, Mitochondrion Biogenesis, and Maize Growth. Plant Cell 24: 676–691**

Pubmed: [Author and Title](#)

Google Scholar: [Author Only](#) [Title Only](#) [Author and Title](#)

**South PF, Cavanagh AP, Liu HW, Ort DR (2019) Synthetic glycolate metabolism pathways stimulate crop growth and productivity in the field. Science (80- ) 363: eaat9077**

Pubmed: [Author and Title](#)

Google Scholar: [Author Only](#) [Title Only](#) [Author and Title](#)

**Stelplflug SC, Sekhon RS, Vaillancourt B, Hirsch CN, Buell CR, de Leon N, Kaepler SM (2016) An expanded maize gene expression atlas based on RNA sequencing and its use to explore root development. Plant Genome. doi: 10.3835/plantgenome2015.04.0025**

Pubmed: [Author and Title](#)

Google Scholar: [Author Only](#) [Title Only](#) [Author and Title](#)

**Strand DD, Fisher N, Kramer DM (2017) The higher plant plastid NAD(P)H dehydrogenase-like complex (NDH) is a high efficiency proton pump that increases ATP production by cyclic electron flow. J Biol Chem 292: 11850–11860**

Pubmed: [Author and Title](#)

Google Scholar: [Author Only](#) [Title Only](#) [Author and Title](#)

**Sun F, Wang X, Bonnard G, Shen Y, Xiu Z, Li X, Gao D, Zhang Z, Tan BC (2015) Empty pericarp7 encodes a mitochondrial E-subgroup pentatricopeptide repeat protein that is required for ccmFN editing, mitochondrial function and seed development in maize. Plant J 84: 283–295**

Pubmed: [Author and Title](#)

Google Scholar: [Author Only](#) [Title Only](#) [Author and Title](#)

**Sun F, Xiu Z, Jiang R, Liu Y, Zhang X, Yang Y, Li X (2019) The mitochondrial pentatricopeptide repeat protein EMP12 is involved in the splicing of three nad2 introns and seed development in maize. J Exp Bot 70: 963–972**

Pubmed: [Author and Title](#)

Google Scholar: [Author Only](#) [Title Only](#) [Author and Title](#)

**Takabayashi A, Kishine M, Asada K, Endo T, Sato F (2005) Differential use of two cyclic electron flows around photosystem I for driving CO<sub>2</sub>-concentration mechanism in C<sub>4</sub> photosynthesis. Proc Natl Acad Sci 102: 16898–16903**

Pubmed: [Author and Title](#)

Google Scholar: [Author Only](#) [Title Only](#) [Author and Title](#)

**Trapnell C, Roberts A, Goff L, Pertea G, Kim D, Kelley DR, Pimentel H, Salzberg SL, Rinn JL, Pachter L (2012) Differential gene and transcript expression analysis of RNA-seq experiments with TopHat and Cufflinks. Nat Protoc 7: 562–578**

Pubmed: [Author and Title](#)

Google Scholar: [Author Only](#) [Title Only](#) [Author and Title](#)

**Tsudzuki T, Wakasugi T, Sugiura M (2001) Comparative analysis of RNA editing sites in higher plant chloroplasts. J Mol Evol 53: 327–332**

Pubmed: [Author and Title](#)

Google Scholar: [Author Only](#) [Title Only](#) [Author and Title](#)

**Wang H, Nussbaum-Wagler T, Li B, Zhao Q, Vigouroux Y, Faller M, Bomblies K, Lukens L, Doebley JF (2005) The origin of the naked grains of maize. Nature 436: 714–719**

Pubmed: [Author and Title](#)

Google Scholar: [Author Only](#) [Title Only](#) [Author and Title](#)

**Wang H, Studer AJ, Zhao Q, Meeley R, Doebley JF (2015) Evidence that the origin of naked kernels during maize domestication was caused by a single amino acid substitution in tga1. Genetics 200: 965–974**

Pubmed: [Author and Title](#)

Google Scholar: [Author Only](#) [Title Only](#) [Author and Title](#)

**Wang P, Duan W, Takabayashi A, Endo T, Shikanai T, Ye J-Y, Mi H (2006) Chloroplastic NAD(P)H Dehydrogenase in Tobacco Leaves Functions in Alleviation of Oxidative Damage Caused by Temperature Stress. Plant Physiol 141: 465–474**

Pubmed: [Author and Title](#)

Google Scholar: [Author Only](#) [Title Only](#) [Author and Title](#)

**Wu A, Hammer GL, Doherty A, von Caemmerer S, Farquhar GD (2019) Quantifying impacts of enhancing photosynthesis on crop yield. Nat Plants 5: 380–388**

Pubmed: [Author and Title](#)

Google Scholar: [Author Only](#) [Title Only](#) [Author and Title](#)

**Xiu Z, Sun F, Shen Y, Zhang X, Jiang R, Bonnard G, Zhang J, Tan BC (2016) EMPTY PERICARP16 is required for mitochondrial nad2 intron 4 cis-splicing, complex i assembly and seed development in maize. Plant J 85: 507–519**

Pubmed: [Author and Title](#)

Google Scholar: [Author Only](#) [Title Only](#) [Author and Title](#)

**Xu F, Copeland C, Li X (2015) Protein Immunoprecipitation Using Nicotiana benthamiana Transient Expression System. Bio-protocol 5: e1520**

Pubmed: [Author and Title](#)

Google Scholar: [Author Only](#) [Title Only](#) [Author and Title](#)

**Yagi Y, Tachikawa M, Noguchi H, Satoh S, Obokata J, Nakamura T (2013) Pentatricopeptide repeat proteins involved in plant organellar RNA editing. RNA Biol 10: 1419–1425**

Pubmed: [Author and Title](#)

Google Scholar: [Author Only](#) [Title Only](#) [Author and Title](#)

**Yamori W, Makino A, Shikanai T (2016) A physiological role of cyclic electron transport around photosystem I in sustaining photosynthesis under fluctuating light in rice. Sci Rep 6: 1–12**

Pubmed: [Author and Title](#)

Google Scholar: [Author Only](#) [Title Only](#) [Author and Title](#)

**Yamori W, Shikanai T, Makino A (2015) Photosystem i cyclic electron flow via chloroplast NADH dehydrogenase-like complex performs a physiological role for photosynthesis at low light. Sci Rep 5: 13908**

Pubmed: [Author and Title](#)

Google Scholar: [Author Only](#) [Title Only](#) [Author and Title](#)

**Yang N, Liu J, Gao Q, Gui S, Chen L, Yang L, Huang J, Deng T, Luo J, He L, et al (2019) Genome assembly of a tropical maize inbred line provides insights into structural variation and crop improvement. Nat Genet 51: 1052–1059**

Pubmed: [Author and Title](#)

Google Scholar: [Author Only](#) [Title Only](#) [Author and Title](#)

**Yin X, Struik PC (2018) The energy budget in C4 photosynthesis: insights from a cell-type-specific electron transport model. New Phytol 218: 986–998**

Pubmed: [Author and Title](#)

Google Scholar: [Author Only](#) [Title Only](#) [Author and Title](#)

**Zhao L, Pan T, Cai C, Wang J, Wei C (2016) Application of whole sections of mature cereal seeds to visualize the morphology of endosperm cell and starch and the distribution of storage protein. J Cereal Sci 71: 19–27**

Pubmed: [Author and Title](#)

Google Scholar: [Author Only](#) [Title Only](#) [Author and Title](#)
